# Supplementary material
Source: HighWire-hosted journal article supplement (http://cmajopen.ca/highwire/filestream/81197/field_highwire_adjunct_files/0/2016-0154-1-at.pdf)
Supplement: 2016-0154-1-at.pdf [file 2016-0154-1-at.pdf]

**Appendix 1 (as supplied by the authors): Survey questionnaire**

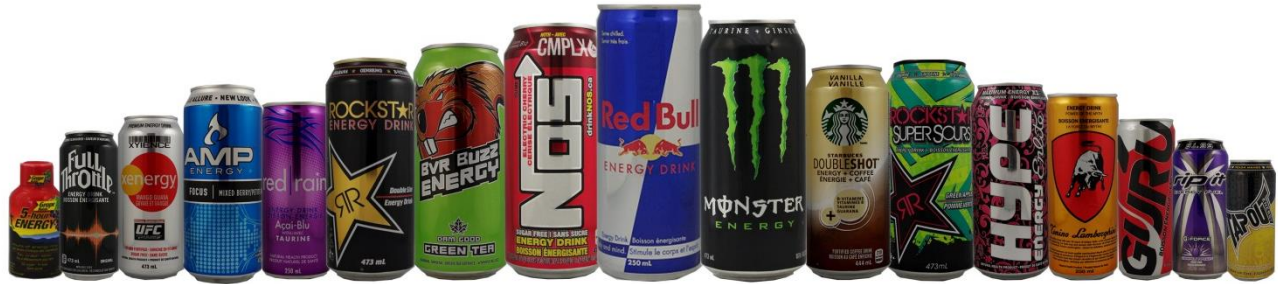

# EVALUATING THE IMPACT OF CANADA'S CAFFEINATED ENERGY DRINK POLICY AMONG YOUTH AND YOUNG ADULTS

**ONLINE SURVEY – Wave 2 (2015)**

## TECHNICAL REPORT - APPENDIX A

**Note:** The full Technical Report is available at <http://davidhammond.ca/wp-content/uploads/2014/12/2015-CED-Technical-Report-Final.pdf>

DAVID HAMMOND, PHD

[dhammond@uwaterloo.ca](mailto:dhammond@uwaterloo.ca)

| Introduction & Screening                                                                                                                |                                                                                                                                                                                                                                                                                                                                                                                                                                                                                                                                                                                                                                                                                                                                                                                                                                                                                                                                                                                                                                                                                                                                                                                                                                                                                                                                                                                                                                                                                                                                                                                                                     |
|-----------------------------------------------------------------------------------------------------------------------------------------|---------------------------------------------------------------------------------------------------------------------------------------------------------------------------------------------------------------------------------------------------------------------------------------------------------------------------------------------------------------------------------------------------------------------------------------------------------------------------------------------------------------------------------------------------------------------------------------------------------------------------------------------------------------------------------------------------------------------------------------------------------------------------------------------------------------------------------------------------------------------------------------------------------------------------------------------------------------------------------------------------------------------------------------------------------------------------------------------------------------------------------------------------------------------------------------------------------------------------------------------------------------------------------------------------------------------------------------------------------------------------------------------------------------------------------------------------------------------------------------------------------------------------------------------------------------------------------------------------------------------|
| <p>Welcome, and thank you for your interest in our food and beverage study.</p> <p>Please click “Start Survey” to begin the survey.</p> |                                                                                                                                                                                                                                                                                                                                                                                                                                                                                                                                                                                                                                                                                                                                                                                                                                                                                                                                                                                                                                                                                                                                                                                                                                                                                                                                                                                                                                                                                                                                                                                                                     |
| Screen.age                                                                                                                              | <p><b>Before we begin, how old are you?</b><br/> Enter age: _____<br/> Refuse to answer</p> <p><b>If under age 12</b> → “Sorry, you are not eligible to participate, but thank you for your time.”<br/> [TERMINATE]<br/> <b>If 12-17 years</b> → “Please close your browser. Your parent must click the link to begin the survey before you can participate.” [TERMINATE]<br/> <b>If 18-24 years</b> → [Proceed to Participant section – Autofill age and start at gender]<br/> <b>If over age 25</b> → [Proceed to Parent questions]</p>                                                                                                                                                                                                                                                                                                                                                                                                                                                                                                                                                                                                                                                                                                                                                                                                                                                                                                                                                                                                                                                                           |
| Parent Screening                                                                                                                        |                                                                                                                                                                                                                                                                                                                                                                                                                                                                                                                                                                                                                                                                                                                                                                                                                                                                                                                                                                                                                                                                                                                                                                                                                                                                                                                                                                                                                                                                                                                                                                                                                     |
| Parent.kids                                                                                                                             | <p>[Programmer: Ask if age&gt;=25]<br/> <b>Do you have any kids between the ages of 12 and 17 living in your household?</b><br/> <b>Yes</b>, I have a child between the age of 12 and 17 living in my household [CONTINUE]<br/> <b>No</b>, I do not have a child between the age of 12 and 17 living in my household → "Thank you for your time. [TERMINATE]"</p>                                                                                                                                                                                                                                                                                                                                                                                                                                                                                                                                                                                                                                                                                                                                                                                                                                                                                                                                                                                                                                                                                                                                                                                                                                                   |
| Parent - Study Information & Consent                                                                                                    |                                                                                                                                                                                                                                                                                                                                                                                                                                                                                                                                                                                                                                                                                                                                                                                                                                                                                                                                                                                                                                                                                                                                                                                                                                                                                                                                                                                                                                                                                                                                                                                                                     |
| Parent.consent                                                                                                                          | <p><b>We would like to invite your child to participate in a study that looks at the views and opinions of youth on caffeine consumption and energy drinks.</b></p> <p>The survey is being conducted by Professor David Hammond of the University of Waterloo, Canada.</p> <ul style="list-style-type: none"> <li>Your child will be asked questions about energy drinks, different foods with caffeine, as well a variety of beverage types, including sports drinks, coffee, and alcohol. Background questions will also be asked (e.g., height, weight, ethnicity, education).</li> <li>Participation is voluntary and your child may skip any question that he/she does not want to answer. Your child will not be asked for their name or any identifying information.</li> <li>All of the information provided in this study will be kept strictly confidential. Study data, with no personal information, will be kept indefinitely on a secured University of Waterloo server.</li> <li>Your child can stop answering the survey at any time without penalty. Any data already collected may be used in the study, unless you contact the researcher to have it deleted.</li> <li>This study has been reviewed by and received ethics clearance through a University of Waterloo Research Ethics Committee. If you have any comments or concerns resulting from your involvement in this study, please contact Dr. Maureen Nummelin, the Director, Office of Research Ethics, at 1-519-888-4567, Ext. 36005 or <a href="mailto:maureen.nummelin@uwaterloo.ca">maureen.nummelin@uwaterloo.ca</a>.</li> </ul> |

|  |                                                                                                                                                                                                                                                                                                                                                                                                                                                                                                                                                                                                                                                                                                                                                                                                                                                                                                                                                                                                                                                                                                                                                                                             |
|--|---------------------------------------------------------------------------------------------------------------------------------------------------------------------------------------------------------------------------------------------------------------------------------------------------------------------------------------------------------------------------------------------------------------------------------------------------------------------------------------------------------------------------------------------------------------------------------------------------------------------------------------------------------------------------------------------------------------------------------------------------------------------------------------------------------------------------------------------------------------------------------------------------------------------------------------------------------------------------------------------------------------------------------------------------------------------------------------------------------------------------------------------------------------------------------------------|
|  | <ul style="list-style-type: none"> <li>If you have any questions about the study you can contact Dr. David Hammond of the University of Waterloo at 519-888-4567 ext. 36462 or <a href="mailto:dhammond@uwaterloo.ca">dhammond@uwaterloo.ca</a>.</li> </ul> <p><b>Can your child participate in the survey?</b></p> <p><b>**If your child is not available at this moment, you can close the browser window. Once your child is available, you can simply re-click on the survey link to continue.**</b></p> <p><b>Yes, he/she can participate <u>right now</u>.</b> → "We would like to ask that you pass the survey off to your child so that he/she can participate. Thank you for your assistance!" [<b>Programmer: Mark as "Parent Consented"</b>] <b>GO TO SURVEY</b></p> <p><b>Yes, he/she can participate <u>later</u>.</b> → "You can close the browser window. Once your child is available, you can simply re-click on the survey link to continue. Thank you for your participation." [<b>Programmer: Mark as "Parent Consented"</b>] <b>TERMINATE</b></p> <p><b>No, he/she cannot participate in the survey.</b> → "Thank you for your time." [<b>TERMINATE – Refusal</b>]</p> |
|--|---------------------------------------------------------------------------------------------------------------------------------------------------------------------------------------------------------------------------------------------------------------------------------------------------------------------------------------------------------------------------------------------------------------------------------------------------------------------------------------------------------------------------------------------------------------------------------------------------------------------------------------------------------------------------------------------------------------------------------------------------------------------------------------------------------------------------------------------------------------------------------------------------------------------------------------------------------------------------------------------------------------------------------------------------------------------------------------------------------------------------------------------------------------------------------------------|

**Participant Screening**

|  |                                                                                                                                                                                                                                                                          |
|--|--------------------------------------------------------------------------------------------------------------------------------------------------------------------------------------------------------------------------------------------------------------------------|
|  | <p><i>Programmer note: If parent.consent=1 or 2</i> [<b>PARENT/GUARDIAN: PLEASE PASS SURVEY OFF TO YOUR CHILD BEFORE CONTINUING</b>]</p> <p>Welcome, and thank you for your interest in our food and beverage study.</p> <p>Please click "Next" to begin the survey.</p> |
|--|--------------------------------------------------------------------------------------------------------------------------------------------------------------------------------------------------------------------------------------------------------------------------|

|     |                                                                                                                                                                                                                                                                                                                                                                                                                                                                                                                                                                                                                     |
|-----|---------------------------------------------------------------------------------------------------------------------------------------------------------------------------------------------------------------------------------------------------------------------------------------------------------------------------------------------------------------------------------------------------------------------------------------------------------------------------------------------------------------------------------------------------------------------------------------------------------------------|
| age | <p><i>Programmer note: If parent.consent=1 or 2</i> [<b>THE FOLLOWING QUESTIONS ARE FOR YOUTH RESPONDENTS.</b>]</p> <p><b>Before we begin, how old are you?</b><br/>         Enter age: _____<br/>         Refuse to answer</p> <p><b>If 12-24 years</b> → [Proceed to Information]<br/> <b>If under age 12 or over 24</b> → "Unfortunately, we can only include people age 12-24 in this study. Sorry, you are not eligible to participate, but thank you for your time." [TERMINATE]</p> <p>→<b>IF REFUSE TO ANSWER:</b> Unfortunately, we need to know your age to determine your eligibility for the study.</p> |
|-----|---------------------------------------------------------------------------------------------------------------------------------------------------------------------------------------------------------------------------------------------------------------------------------------------------------------------------------------------------------------------------------------------------------------------------------------------------------------------------------------------------------------------------------------------------------------------------------------------------------------------|

|        |                                                                                                                   |
|--------|-------------------------------------------------------------------------------------------------------------------|
| Gender | <p><b>Are you male or female?</b><br/>         1 Female<br/>         2 Male<br/>         -88 Refuse to answer</p> |
|--------|-------------------------------------------------------------------------------------------------------------------|

|  |                                                                                                                                                                                   |
|--|-----------------------------------------------------------------------------------------------------------------------------------------------------------------------------------|
|  | <p><b>QUOTAS [for programmer]</b><br/>         500 females aged 12-17<br/>         500 males aged 12-17<br/>         500 females aged 18-24<br/>         500 males aged 18-24</p> |
|--|-----------------------------------------------------------------------------------------------------------------------------------------------------------------------------------|

**Participant – Study Information & Consent**

Please read the following information carefully, and once you have read the study details and agree to them, you can begin the survey.

- You are being asked to participate in a research study about food and beverages. The survey is being conducted by Professor David Hammond of the School of Public Health and Health Systems at the University of Waterloo, Canada.
- You will be asked questions about energy drinks, different foods with caffeine, as well as a variety of beverage types, including sports drinks, coffee, and alcohol.
- The survey takes approximately 20 minutes to complete.
- Participation is voluntary and you may skip any question that you do not want to answer. You will not be asked to provide your name or any identifying information.
- To thank you for your time, you or your parent/guardian will receive the usual level of payment from the survey company.
- All of the information you provide in this study will be kept strictly confidential - only the investigators directly associated with the study will have access to this information. Study data, with no personal information, will be kept indefinitely on a secured University of Waterloo server.
- You are free to choose whether or not to participate in this study, and you can choose to stop being a part of it at any time without penalty. If you choose to discontinue the survey, you may receive remuneration by declining all further questions until the end of the survey. Any data already collected may be used in the study, unless you contact the researcher to have it deleted.
- This project has been reviewed and received ethics clearance through a University of Waterloo Research Ethics Committee. However, the final decision about participation is yours. Participants who have concerns or questions about their involvement in the project may contact the Chief Ethics Officer, Office of Research Ethics at 519-888-4567, ext. 36005 or [maureen.nummelin@uwaterloo.ca](mailto:maureen.nummelin@uwaterloo.ca).
- If you have any questions about the study you can contact Professor David Hammond of the University of Waterloo at 519-888-4567 ext. 36462 or [dhammond@uwaterloo.ca](mailto:dhammond@uwaterloo.ca).

## Consent

|         |                                                                                                                                                                                                                                                                           |
|---------|---------------------------------------------------------------------------------------------------------------------------------------------------------------------------------------------------------------------------------------------------------------------------|
| consent | <p>Based on the information you received, do you agree to take part in this research study being conducted by Professor David Hammond of the University of Waterloo?</p> <p>Yes → <i>[continue to survey]</i></p> <p>No → Thank you for your time. <i>[TERMINATE]</i></p> |
|---------|---------------------------------------------------------------------------------------------------------------------------------------------------------------------------------------------------------------------------------------------------------------------------|

## Caffeine intake: previous-day recall (modified ASA)

[\[caffeine intake recall tool here\]](#)

## Reasons for using energy shots vs. drinks

**Reasons for use: shots vs. drinks** *Programmer note: Randomize respondents to see image of either can of NOS or NOS energy shot (with hand for scale). [NOS\_Drink.jpg, NOS\_Shot.jpg]*

Product.reason

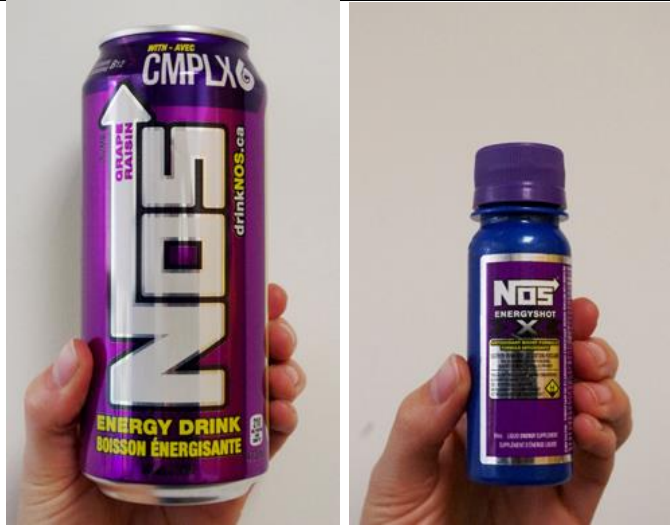

**Do people use this product for any of the following reasons?**  
 Select all that apply.

1. To stay awake
  2. To increase concentration or alertness
  3. For the taste
  4. For the vitamins
  5. For the herbal ingredients
  6. To improve sports performance or physical activity
  7. For going out or partying
  8. To mix with alcohol
  9. To help lose weight or help keep weight off
  10. To sober up after drinking alcohol
  11. To cope with a hangover
  12. These products are cool
  13. Friends drink them
  14. Other → Please specify: *[open-ended]*
  15. None of the above *[Programmer: allow to select only if no options chosen above]*
- 77 Don't know  
 -88 Refuse to answer

## Patterns of CED consumption

|                                                          |                                                                                                                                                                                                                                                                                                                                                                                                                                      |
|----------------------------------------------------------|--------------------------------------------------------------------------------------------------------------------------------------------------------------------------------------------------------------------------------------------------------------------------------------------------------------------------------------------------------------------------------------------------------------------------------------|
|                                                          | <p><b>We would like to ask you some more questions about energy drinks. Popular brands include <i>Red Bull, Monster, Rockstar, NOS, Amp, and Full Throttle</i>, but there are others. DO NOT include sports drinks, such as <i>Gatorade or Powerade</i>.</b></p>                                                                                                                                                                     |
| <p><b>Ever use</b><br/>                 CED.ever.use</p> | <p><i>Programmer note: Code as 1 and skip to CED.age.initiate if selected "Energy drink" or "Energy shot" in intake tool (C.I.A.list=5)</i></p> <p><b>Have you <u>ever</u> tried an energy drink, even a few sips?</b><br/>                 Include energy drinks mixed with other drinks.</p> <ol style="list-style-type: none"> <li>1 Yes</li> <li>2 No</li> </ol> <p>-77 Don't know<br/>                 -88 Refuse to answer</p> |

|                                                               |                                                                                                                                                                                                                                                                                                                                                                                                                                                                                    |
|---------------------------------------------------------------|------------------------------------------------------------------------------------------------------------------------------------------------------------------------------------------------------------------------------------------------------------------------------------------------------------------------------------------------------------------------------------------------------------------------------------------------------------------------------------|
| <b>Consumption-<br/>Age of initiation</b><br>CED.age.initiate | <p><i>Programmer note: only ask if CED.ever.use = 1 (Ever users)</i></p> <p><b>How old were you when you first tried an energy drink, even just a few sips?</b></p> <p>Enter age: _____ [<i>numeric field, limit of 1 to current age</i>]</p> <p>-77 Don't know<br/>-88 Refuse to answer</p>                                                                                                                                                                                       |
| <b>Consumption-<br/>Frequency of use</b><br>CED.last.use      | <p><i>Programmer note: only ask if CED.ever.use = 1 (Ever users)</i></p> <p><b>When was the <u>LAST TIME</u> you had an energy drink?</b></p> <p>Include any energy drinks mixed with alcohol.</p> <p>In the last 24 hours<br/>In the last 7 days<br/>In the last 30 days<br/>In the last 6 months<br/>In the last 12 months<br/>More than 12 months ago<br/>-77 Don't know<br/>-88 Refuse to answer</p>                                                                           |
| <b>Consumption-<br/>Amount</b><br>consumption.amount          | <p><i>Programmer note: only ask if CED.ever.use = 1 (Ever users)</i></p> <p><b>How many energy drinks have you consumed in your life?</b></p> <p>1 drink = 1 can, container or glass, including energy drinks mixed with alcohol. If you are not sure, please provide your best guess.</p> <p>None<br/>1 drink or less<br/>2-5 drinks<br/>6-10 drinks<br/>11-20 drinks<br/>21-50 drinks<br/>51-100 drinks<br/>More than 100 drinks<br/>-77 Don't know<br/>-88 Refuse to answer</p> |
| <b>Consumption – amount</b><br>CED.max#                       | <p><i>Programmer note: only ask if CED.ever.use = 1 (Ever users)</i></p> <p><b>What is the largest number of energy drinks you have ever had <u>IN ONE DAY</u>?</b></p> <p>Include any energy drinks mixed with alcohol.</p> <p>Enter number: _____ [<i>numeric</i>]</p> <p>-77 Don't know<br/>-88 Refuse to answer</p>                                                                                                                                                            |
| <b>Energy shot<br/>consumption</b><br>shot.ever               | <p><b>Have you <u>EVER</u> consumed an energy SHOT, such as the products shown below?</b></p> <p>[<i>show EnergyShots.jpg</i>]</p>                                                                                                                                                                                                                                                                                                                                                 |

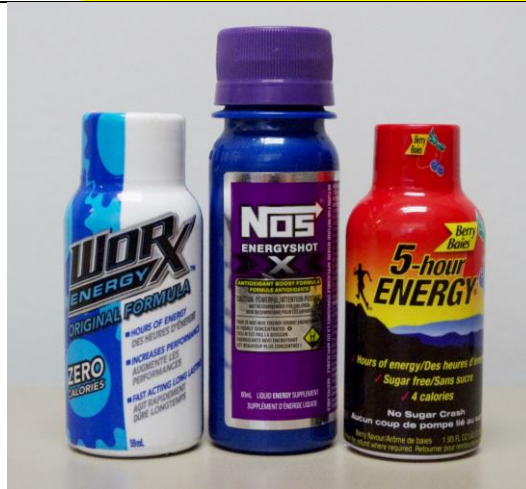

- 1 Yes
- 2 No
- 77 Don't know
- 88 Refuse to answer

*Programmer notes:*

*If shot.ever= (1, -77, or -88), continue to shot.incl  
If shot.ever= 2, skip to text.define*

*If shot.ever= 1 AND CED.ever.use=2, create variable that marks this and then set CED.ever.use to "1" (so that ever-users of shots also get asked "ever-user" questions later, in addition to those who say they've used CEDs in the CED.ever.use question). Skip to text.shot.*

**Energy shot**  
shot.incl

*Programmer note: only ask if shot.ever= 1*

**In the questions you have answered so far about energy drinks, did you include energy SHOTS in your answers?**

- 1 Yes, I included energy shots in my answers
- 2 No, I DID NOT include energy shots in my answers
- 77 Don't know
- 88 Refuse to answer

*Programmer notes:*

*If shot.incl= (1, -77, or -88), continue to text.repeat  
If shot.incl= 2, skip to text.shot*

text.repeat

*Programmer note: If shot.incl=(1,-77 or, -88), show the following text:*

**Please answer the following questions again, separately for energy DRINKS and energy SHOTS.**

**Consumption-  
Age of initiation**  
CED.age.initiate2

*Programmer note: if shot.incl=(1,-77 or, -88)*

**How old were you when you first tried an energy DRINK, even just a few sips?**

Enter age: \_\_\_\_\_ [numeric field, limit of 1 to current age]

- 77 Don't know
- 88 Refuse to answer

**Consumption-  
Frequency of use**  
CED.last.use2

*Programmer note: if shot.incl=(1,-77 or, -88)*

**When was the LAST TIME you had an energy DRINK?**

Include any energy drinks mixed with alcohol.



|                                                                                    |                                                                                                                                                                                                                                                                                                                                                                                                                                                                                                                                                                                                                                            |
|------------------------------------------------------------------------------------|--------------------------------------------------------------------------------------------------------------------------------------------------------------------------------------------------------------------------------------------------------------------------------------------------------------------------------------------------------------------------------------------------------------------------------------------------------------------------------------------------------------------------------------------------------------------------------------------------------------------------------------------|
|                                                                                    | <p>In the last 24 hours<br/>                 In the last 7 days<br/>                 In the last 30 days<br/>                 In the last 6 months<br/>                 In the last 12 months<br/>                 More than 12 months ago<br/>                 -77 Don't know<br/>                 -88 Refuse to answer</p>                                                                                                                                                                                                                                                                                                               |
| <p><b>Consumption-Amount</b><br/>                 consumption.amount2</p>          | <p><i>Programmer note: if shot.incl=(1,-77 or, -88)</i><br/> <b>How many energy DRINKS have you consumed in your life?</b><br/>                 1 drink = 1 can, container or glass, including energy drinks mixed with alcohol. If you are not sure, please provide your best guess.</p> <p>None<br/>                 1 drink or less<br/>                 2-5 drinks<br/>                 6-10 drinks<br/>                 11-20 drinks<br/>                 21-50 drinks<br/>                 51-100 drinks<br/>                 More than 100 drinks<br/>                 -77 Don't know<br/>                 -88 Refuse to answer</p> |
| <p><b>Consumption – amount</b><br/>                 CED.max#2</p>                  | <p><i>Programmer note: only ask if CED.ever.use = 1 (Ever users)</i><br/> <b>What is the largest number of energy DRINKS you have ever had <u>IN ONE DAY?</u></b><br/>                 Include any energy drinks mixed with alcohol.</p> <p>Enter number: _____ [numeric]<br/>                 -77 Don't know<br/>                 -88 Refuse to answer</p>                                                                                                                                                                                                                                                                                |
| <p>text.shot</p>                                                                   | <p><i>Programmer note: If shot.incl=2, show the following text:</i><br/> <b>Please answer the following questions, about energy SHOTS.</b></p>                                                                                                                                                                                                                                                                                                                                                                                                                                                                                             |
| <p><b>Consumption-Age of initiation</b><br/>                 shot.age.initiate</p> | <p><i>Programmer note: if shot.ever= 1</i><br/> <b>How old were you when you first tried an energy SHOT, even just a few sips?</b></p> <p>Enter age: _____ [numeric field, limit of 1 to current age]<br/>                 -77 Don't know<br/>                 -88 Refuse to answer</p>                                                                                                                                                                                                                                                                                                                                                    |
| <p><b>Consumption-Frequency of use</b><br/>                 shot.last.use</p>      | <p><i>Programmer note: if shot.ever= 1</i><br/> <b>When was the <u>LAST TIME</u> you had an energy SHOT?</b></p> <p>In the last 24 hours<br/>                 In the last 7 days<br/>                 In the last 30 days<br/>                 In the last 6 months<br/>                 In the last 12 months<br/>                 More than 12 months ago</p>                                                                                                                                                                                                                                                                            |

|                                                                                                                                                                    |                                                                                                                                                                                                                                                                                                                                                                                                                                                                                                                                                                                                                                                                                                                                                                                                                                                                                                                                                                                                                                                                                                                                                                        |
|--------------------------------------------------------------------------------------------------------------------------------------------------------------------|------------------------------------------------------------------------------------------------------------------------------------------------------------------------------------------------------------------------------------------------------------------------------------------------------------------------------------------------------------------------------------------------------------------------------------------------------------------------------------------------------------------------------------------------------------------------------------------------------------------------------------------------------------------------------------------------------------------------------------------------------------------------------------------------------------------------------------------------------------------------------------------------------------------------------------------------------------------------------------------------------------------------------------------------------------------------------------------------------------------------------------------------------------------------|
|                                                                                                                                                                    | <p>-77 Don't know<br/>-88 Refuse to answer</p>                                                                                                                                                                                                                                                                                                                                                                                                                                                                                                                                                                                                                                                                                                                                                                                                                                                                                                                                                                                                                                                                                                                         |
| <p><b>Consumption-Amount</b><br/>shot.cons.amount</p>                                                                                                              | <p><i>Programmer note: if shot.ever= 1</i><br/><b>How many energy SHOTS have you consumed in your life?</b><br/>If you are not sure, please provide your best guess.</p> <p>None<br/>1 shot or less<br/>2-5 shots<br/>6-10 shots<br/>11-20 shots<br/>21-50 shots<br/>51-100 shots<br/>More than 100 shots<br/>-77 Don't know<br/>-88 Refuse to answer</p>                                                                                                                                                                                                                                                                                                                                                                                                                                                                                                                                                                                                                                                                                                                                                                                                              |
| <p><b>Consumption – amount</b><br/>shot.max#</p>                                                                                                                   | <p><i>Programmer note: only ask if CED.ever.use = 1 (Ever users)</i><br/><b>What is the largest number of energy SHOTS you have ever had <u>IN ONE DAY?</u></b><br/>Enter number: _____ [numeric]<br/>-77 Don't know<br/>-88 Refuse to answer</p>                                                                                                                                                                                                                                                                                                                                                                                                                                                                                                                                                                                                                                                                                                                                                                                                                                                                                                                      |
| <p>text.define</p>                                                                                                                                                 | <p><i>Programmer note: show for all</i><br/><b>IMPORTANT:</b><br/><b>For the rest of the survey, when asked about “energy drinks” please include ALL energy DRINKS AND SHOTS, including those mixed with alcohol. DO NOT include sports drinks, such as Gatorade or Powerade.</b></p>                                                                                                                                                                                                                                                                                                                                                                                                                                                                                                                                                                                                                                                                                                                                                                                                                                                                                  |
| <p><b>Consumption-Patterns</b></p> <p>Day2.con<br/>Day3.con<br/>Day4.con<br/>Day5.con<br/>Day6.con<br/>Day7.con</p> <p>Day2.n<br/>Day3.n<br/>Day4.n<br/>Day5.n</p> | <p><i>Programmer note: only ask if CED.last.use = 1 or 2</i><br/>Now, please think about the energy drinks you've had in the past week. You already told us about yesterday. This question asks about the other days in the past week.</p> <p><b>Did you have any energy drinks on ...</b><br/><b>[date for 2 days prior – i.e., Wednesday April 23]</b><br/><b>[date for 3 days prior – i.e., Tuesday April 22]</b><br/><b>[date for 4 days prior – i.e., Monday April 21]</b><br/><b>[date for 5 days prior – i.e., Sunday April 20]</b><br/><b>[date for 6 days prior – i.e., Saturday April 19]</b><br/><b>[date for 7 days prior – i.e., Friday April 18]</b><br/>1 Yes<br/>2 No<br/>-77 Don't know<br/>-88 Refuse to answer</p> <p><i>[Programmer: For any days that they selected “Yes” for in Day2.con . . . Day7.con, ask the following, inserting the date]</i><br/><b>How many energy drinks did you have on [insert day]?</b><br/>Please enter the number of each type/size that you had in the boxes below.<br/><i>[Show 3 images (energyshot_60.jpg, energycan_250.jpg, energycan_473.jpg) and have number entry boxes below or beside each one]</i></p> |

|                                                                                                                                                                             |                                                                                                                                                                                                                                                                                                                                                                            |
|-----------------------------------------------------------------------------------------------------------------------------------------------------------------------------|----------------------------------------------------------------------------------------------------------------------------------------------------------------------------------------------------------------------------------------------------------------------------------------------------------------------------------------------------------------------------|
| Day6.n<br>Day7.n                                                                                                                                                            | _____ [numeric fields, limit 1 to 20]<br>-77 Don't know<br>-88 Refuse to answer                                                                                                                                                                                                                                                                                            |
| <b>Consumption – Situation</b><br>(CED.where)<br>CED.where1<br>CED.where2<br>CED.where3<br>CED.where4<br>CED.where5<br>CED.where6<br>CED.where7<br>CED.where8<br>CED.where9 | <b>Have you EVER had an energy drink in the following places?</b><br>Select all that apply.<br>1 At work<br>2 At school<br>3 While driving<br>4 At home<br>5 At someone else's house<br>6 At a restaurant<br>7 At a bar/pub/nightclub<br>8 At the gym or while playing sports<br>9 Somewhere else → Please specify: [open-ended]<br>-77 Don't know<br>-88 Refuse to answer |
| <b>Offered</b><br>CED.offer                                                                                                                                                 | <i>Programmer note: only ask if CED.ever.use = 0 or -77(Never users)</i><br><b>Have you ever been offered an energy drink to try?</b><br>1 Yes<br>2 No<br>-77 Don't know<br>-88 Refuse to answer                                                                                                                                                                           |
| <b>Friend Use</b><br>CED.friend#                                                                                                                                            | <b>Of your five closest friends, how many have tried energy drinks?</b><br>None<br>1 friend<br>2 friends<br>3 friends<br>4 friends<br>5 friends<br>-77 Don't know<br>-88 Refuse to answer                                                                                                                                                                                  |
| <b>Interest in trying</b><br>CED.useagain                                                                                                                                   | <i>Programmer note: only ask if CED.ever.use = 1 (Ever users)</i><br><b>Do you think you might have an energy drink in the future?</b><br>Definitely yes<br>Probably yes<br>Not sure<br>Probably not<br>Definitely not<br>-77 Don't know<br>-88 Refuse to answer                                                                                                           |
| <b>Interest in trying</b><br>CED.try.interest                                                                                                                               | <i>Programmer note: only ask if CED.ever.use = 0 or -77 (Never users)</i><br><b>Are you interested in trying an energy drink in the future?</b><br>Definitely yes<br>Probably yes<br>Not sure                                                                                                                                                                              |

|                                                                   |                                                                                                                                                                                                                                                                                                                                                                                                                                                                                                                                                                                                        |
|-------------------------------------------------------------------|--------------------------------------------------------------------------------------------------------------------------------------------------------------------------------------------------------------------------------------------------------------------------------------------------------------------------------------------------------------------------------------------------------------------------------------------------------------------------------------------------------------------------------------------------------------------------------------------------------|
|                                                                   | <p>Probably not<br/>         Definitely not<br/>         -77 Don't know<br/>         -88 Refuse to answer</p>                                                                                                                                                                                                                                                                                                                                                                                                                                                                                          |
| <p><b>Susceptibility 2</b><br/>         CED.try.bestfriend</p>    | <p><i>Programmer note: only ask if CED.ever.use = 0 or -77 (Never users)</i></p> <p><b>If one of your best friends were to offer you an energy drink, would you drink it?</b></p> <p>Definitely yes<br/>         Probably yes<br/>         Not sure<br/>         Probably not<br/>         Definitely not<br/>         -77 Don't know<br/>         -88 Refuse to answer</p>                                                                                                                                                                                                                            |
| <p><b>susceptibility</b></p>                                      | <p><i>[Programmer: Create susceptibility variable - "Not Susceptible" if CED.try.interest and CED.try.bestfriend are BOTH "definitely not", "Susceptible" if any other answer to these.]</i></p>                                                                                                                                                                                                                                                                                                                                                                                                       |
| <p><b>Brand awareness</b><br/>         Brand.aware</p>            | <p><b>Before starting the survey, had you heard of any of the following brands? Select all that apply.</b></p> <p>Red Bull<br/>         Monster<br/>         Rockstar<br/>         5-Hour Energy<br/>         NOS<br/>         Amp<br/>         Full Throttle<br/>         Xenergy (Xyience)<br/>         Beaver Buzz<br/>         Shred<br/>         Bomb<br/>         Rage<br/>         Guru<br/>         Hype<br/>         Other brand → Please specify: <i>[open-ended]</i><br/>         I have not heard of any of these brands<br/>         -77 Don't know<br/>         -88 Refuse to answer</p> |
| <p><b>Consumption – Brands tried</b><br/>         Brand.tried</p> | <p><i>Programmer note: only ask if CED.ever.use = 1 (Ever users)<br/>         ....and only show options selected in Brand.aware</i></p> <p><b>Which, if any, of these brands have you EVER tried?</b></p> <p>Select all that apply.</p> <p><i>[Programmer: Insert list of brands selected in brand.aware, including anything typed under "Other"]</i></p> <p>Other brand → Please specify: <i>[open-ended]</i><br/>         I have not tried any of these brands<br/>         -77 Don't know<br/>         -88 Refuse to answer</p>                                                                     |
| <p><b>Brand preference</b></p>                                    | <p><i>Programmer note: only ask if CED.ever.use = 1 (Ever users)<br/>         ....and only show options selected in Brand.tried</i></p> <p><b>What brand(s) do you usually drink?</b></p>                                                                                                                                                                                                                                                                                                                                                                                                              |

|                                               |                                                                                                                                                                                                                                                                                                                                                                                                                                                                                                                                                                    |
|-----------------------------------------------|--------------------------------------------------------------------------------------------------------------------------------------------------------------------------------------------------------------------------------------------------------------------------------------------------------------------------------------------------------------------------------------------------------------------------------------------------------------------------------------------------------------------------------------------------------------------|
| Usual.brand                                   | <p>Select all that apply.<br/> <b>[Programmer: only insert brand family list selected in brand.tried, including anything typed under "Other"]</b><br/> Other brand → Please specify: [open-ended]<br/> I don't have a usual brand<br/> -77 Don't know<br/> -88 Refuse to answer</p>                                                                                                                                                                                                                                                                                |
| <b>Brand – Sugar-free</b><br>Brand.light      | <p><i>Programmer note: only ask if CED.ever.use = 1 (Ever users)</i><br/> <b>When you have an energy drink, how often is it sugar-free or low calorie?</b><br/> Never<br/> Sometimes<br/> Usually<br/> -77 Don't know<br/> -88 Refuse to answer</p>                                                                                                                                                                                                                                                                                                                |
| <b>Purchase - Ever</b><br>Purchase.ever       | <p><i>Programmer note: only ask if CED.ever.use = 1 (Ever users)</i><br/> <b>Have you ever bought an energy drink for yourself in a store?</b><br/> 1 Yes<br/> 2 No<br/> -77 Don't know<br/> -88 Refuse to answer</p>                                                                                                                                                                                                                                                                                                                                              |
| <b>Purchase - Locations</b><br>Purchase.place | <p><i>Programmer note: only ask if Purchase.ever = 1 (Ever users &amp; purchaser)</i><br/> <b>Where have you purchased energy drinks?</b><br/> Select all that apply.<br/> [Pre-coded checklist]</p> <ol style="list-style-type: none"> <li>1. Convenience store/corner store/gas station</li> <li>2. Grocery store/supermarket</li> <li>3. Liquor store</li> <li>4. From a friend/relative</li> <li>5. Vending machine</li> <li>6. Pharmacy/drugstore</li> <li>7. Other → Please specify: [open-ended]</li> </ol> <p>-77 Don't know<br/> -88 Refuse to answer</p> |
| Purchase.liquor                               | <p><i>Programmer note: only ask if "liquor store" selected in purchase.place</i><br/> <b>What product(s) did you purchase from a liquor store? List all energy drink products that you have purchased from a liquor store.</b><br/> [open-ended]</p>                                                                                                                                                                                                                                                                                                               |
| Purchase.liquor.caffeine                      | <p><i>Programmer note: only ask if "liquor store" selected in purchase.place</i><br/> <b>Do you think the energy drink product you purchased from a liquor store has more, less, or about the same amount of caffeine as a regular (non-alcoholic) energy drink?</b><br/> More caffeine than a non-alcoholic energy drink<br/> Less caffeine than a non-alcoholic energy drink<br/> About the same as a non-alcoholic energy drink<br/> -77 Don't know<br/> -88 Refuse to answer</p>                                                                               |

|                                                                                                                                                                                                                                                        |                                                                                                                                                                                                                                                                                                                                                                                                                                                                                                                                                                                                                                                                                                                                                                                                                                                                                                                                                                                                      |          |          |          |                  |                   |               |                   |               |  |                   |  |  |  |             |  |           |  |                  |  |  |  |                  |  |               |
|--------------------------------------------------------------------------------------------------------------------------------------------------------------------------------------------------------------------------------------------------------|------------------------------------------------------------------------------------------------------------------------------------------------------------------------------------------------------------------------------------------------------------------------------------------------------------------------------------------------------------------------------------------------------------------------------------------------------------------------------------------------------------------------------------------------------------------------------------------------------------------------------------------------------------------------------------------------------------------------------------------------------------------------------------------------------------------------------------------------------------------------------------------------------------------------------------------------------------------------------------------------------|----------|----------|----------|------------------|-------------------|---------------|-------------------|---------------|--|-------------------|--|--|--|-------------|--|-----------|--|------------------|--|--|--|------------------|--|---------------|
| Purchase.vending                                                                                                                                                                                                                                       | <p><i>Programmer note: only ask if "vending machine" selected in purchase.place</i></p> <p><b>Where was the vending machine located?</b> List all places that you have purchased energy drinks from a vending machine.</p> <p>[open-ended]</p>                                                                                                                                                                                                                                                                                                                                                                                                                                                                                                                                                                                                                                                                                                                                                       |          |          |          |                  |                   |               |                   |               |  |                   |  |  |  |             |  |           |  |                  |  |  |  |                  |  |               |
| <p><b>Brand choice – factors</b><br/>(Choice.factors)</p> <p>Choice.energy<br/>Choice.sugar<br/>Choice.crash<br/>Choice.vitamins<br/>Choice.herbal<br/>Choice.price<br/>Choice.brand<br/>Choice.convenience<br/>Choice.flavour<br/>Choice.caffeine</p> | <p><i>Programmer note: only ask if CED.ever.use = 1 (Ever users). Rrandomize order of response options</i></p> <p><b>Rate the importance of each of the following factors when choosing an energy drink.</b></p> <table border="0" style="width: 100%; text-align: center;"> <tr> <td></td> <td><b>1</b></td> <td><b>2</b></td> <td><b>3</b></td> <td><b>4</b></td> <td><b>5</b></td> <td><b>Don't know</b></td> <td><b>Refuse</b></td> </tr> <tr> <td></td> <td><b>Not at all</b></td> <td></td> <td></td> <td></td> <td><b>Very</b></td> <td></td> <td><b>to</b></td> </tr> <tr> <td></td> <td><b>important</b></td> <td></td> <td></td> <td></td> <td><b>important</b></td> <td></td> <td><b>answer</b></td> </tr> </table> <p><b>Energy boost</b></p> <p><b>Sugar level</b></p> <p><b>Crash effect</b></p> <p><b>Vitamins</b></p> <p><b>Herbal ingredients</b></p> <p><b>Price</b></p> <p><b>Brand</b></p> <p><b>Convenience</b></p> <p><b>Taste / flavours</b></p> <p><b>Caffeine level</b></p> |          | <b>1</b> | <b>2</b> | <b>3</b>         | <b>4</b>          | <b>5</b>      | <b>Don't know</b> | <b>Refuse</b> |  | <b>Not at all</b> |  |  |  | <b>Very</b> |  | <b>to</b> |  | <b>important</b> |  |  |  | <b>important</b> |  | <b>answer</b> |
|                                                                                                                                                                                                                                                        | <b>1</b>                                                                                                                                                                                                                                                                                                                                                                                                                                                                                                                                                                                                                                                                                                                                                                                                                                                                                                                                                                                             | <b>2</b> | <b>3</b> | <b>4</b> | <b>5</b>         | <b>Don't know</b> | <b>Refuse</b> |                   |               |  |                   |  |  |  |             |  |           |  |                  |  |  |  |                  |  |               |
|                                                                                                                                                                                                                                                        | <b>Not at all</b>                                                                                                                                                                                                                                                                                                                                                                                                                                                                                                                                                                                                                                                                                                                                                                                                                                                                                                                                                                                    |          |          |          | <b>Very</b>      |                   | <b>to</b>     |                   |               |  |                   |  |  |  |             |  |           |  |                  |  |  |  |                  |  |               |
|                                                                                                                                                                                                                                                        | <b>important</b>                                                                                                                                                                                                                                                                                                                                                                                                                                                                                                                                                                                                                                                                                                                                                                                                                                                                                                                                                                                     |          |          |          | <b>important</b> |                   | <b>answer</b> |                   |               |  |                   |  |  |  |             |  |           |  |                  |  |  |  |                  |  |               |
| Warning.statement1                                                                                                                                                                                                                                     | <p><b>As far you know, are there any warning statements on cans or bottles of energy drinks?</b></p> <p>1 Yes<br/>2 No<br/>-77 Don't know<br/>-88 Refuse to answer</p>                                                                                                                                                                                                                                                                                                                                                                                                                                                                                                                                                                                                                                                                                                                                                                                                                               |          |          |          |                  |                   |               |                   |               |  |                   |  |  |  |             |  |           |  |                  |  |  |  |                  |  |               |
| Warning.statement2                                                                                                                                                                                                                                     | <p><b>Please describe the warning messages or statements. If you have seen more than one warning, please describe as many as possible.</b></p> <p>[Open ended]</p> <p>-77 Don't know<br/>-88 Refuse to answer</p>                                                                                                                                                                                                                                                                                                                                                                                                                                                                                                                                                                                                                                                                                                                                                                                    |          |          |          |                  |                   |               |                   |               |  |                   |  |  |  |             |  |           |  |                  |  |  |  |                  |  |               |

## Side effects

|                                                                                                                                                            |                                                                                                                                                                                                                                                                                                                                                                                                                                      |
|------------------------------------------------------------------------------------------------------------------------------------------------------------|--------------------------------------------------------------------------------------------------------------------------------------------------------------------------------------------------------------------------------------------------------------------------------------------------------------------------------------------------------------------------------------------------------------------------------------|
| <p><b>Side-effects – Ever</b><br/>(side.CED.ever)</p> <p>Side.CED.jolt<br/>Side.CED.headache<br/>Side.CED.jitter<br/>Side.CED.sleep<br/>Side.CED.heart</p> | <p><i>Programmer note: only ask if CED.ever.use = 1 (Ever users)</i></p> <p><b>Have you ever experienced any of the following after drinking an energy drink?</b></p> <p>Select all that apply.</p> <ul style="list-style-type: none"> <li>• “Jolt and crash” episodes (increased alertness and energy followed by a sudden drop in energy)</li> <li>• Headache</li> <li>• Jittery/shaking</li> <li>• Difficulty sleeping</li> </ul> |
|------------------------------------------------------------------------------------------------------------------------------------------------------------|--------------------------------------------------------------------------------------------------------------------------------------------------------------------------------------------------------------------------------------------------------------------------------------------------------------------------------------------------------------------------------------------------------------------------------------|

|                                                                                                                                           |                                                                                                                                                                                                                                                                                                                                                                                                                                                                                                                                                                            |
|-------------------------------------------------------------------------------------------------------------------------------------------|----------------------------------------------------------------------------------------------------------------------------------------------------------------------------------------------------------------------------------------------------------------------------------------------------------------------------------------------------------------------------------------------------------------------------------------------------------------------------------------------------------------------------------------------------------------------------|
| <p>Side.CED.chest<br/>Side.CED.nausea<br/>Side.CED.seizure<br/>Side.CED.headache<br/>Side.CED.sex<br/>SideCED.other<br/>Side.CED.none</p> | <ul style="list-style-type: none"> <li>• Fast heart beat</li> <li>• Chest pain</li> <li>• Nausea/vomiting/diarrhea</li> <li>• Seizures</li> <li>• Decreased sexual performance</li> <li>• Dental pain</li> <li>• Other → Please specify: <i>[open-ended]</i></li> <li>• None of the above <i>[Programmer: allow to select only if no options chosen above]</i></li> </ul> <p>-77 Don't know<br/>-88 Refuse to answer</p>                                                                                                                                                   |
| <p>Side.CED.heart.freq</p>                                                                                                                | <p><i>Programmer note: only ask if Side.CED.heart = 1</i></p> <p><b>How many times have you experienced a fast heart beat after consuming energy drinks?</b></p> <p>1 Never<br/>2 Once<br/>3 More than once<br/>-77 Don't know<br/>-88 Refuse to answer</p>                                                                                                                                                                                                                                                                                                                |
| <p>Side.CED.chest.freq</p>                                                                                                                | <p><i>Programmer note: only ask if Side.CED.chest = 1</i></p> <p><b>How many times have you experienced chest pain after consuming energy drinks?</b></p> <p>1 Never<br/>2 Once<br/>3 More than once<br/>-77 Don't know<br/>-88 Refuse to answer</p>                                                                                                                                                                                                                                                                                                                       |
| <p>Side.CED.seizure.freq</p>                                                                                                              | <p><i>Programmer note: only ask if Side.CED.seizure = 1</i></p> <p><b>How many times have you experienced seizures after consuming energy drinks?</b></p> <p>1 Never<br/>2 Once<br/>3 More than once<br/>-77 Don't know<br/>-88 Refuse to answer</p>                                                                                                                                                                                                                                                                                                                       |
| <p>Side.CED.activity</p>                                                                                                                  | <p><i>Programmer note: ask if selected "yes" to any item in side.CED.ever</i></p> <p><b>When you experienced side effects after consuming energy drinks, were you also ... (Select all that apply)</b></p> <p>1 Participating in sports or physical activity<br/>2 Drinking alcohol<br/>3 Taking recreational drugs (e.g., marijuana)<br/>4 Taking medication(s)<br/>5 Consuming other caffeinated products (coffee, supplements, etc.)<br/>6 None of these <i>[Programmer: only allow if neither option chosen above]</i><br/>-77 Don't know<br/>-88 Refuse to answer</p> |
| <p>Side.CED.n60<br/>Side.CED.n250<br/>Side.CED.n473</p>                                                                                   | <p><i>Programmer note: ask if selected "yes" to any item in side.CED.ever</i></p> <p><b>When you experienced side effects, how many energy drinks did you consume?</b></p> <p>Please enter the number of each type/size that you had in the boxes below.<br/><i>[Show 3 images (energyspot_60.jpg, energycan_250.jpg, energycan_473.jpg) and have number entry boxes below or beside each one]</i></p>                                                                                                                                                                     |

|                                                               |                                                                                                                                                                                                                                                                                                                                                                                                   |
|---------------------------------------------------------------|---------------------------------------------------------------------------------------------------------------------------------------------------------------------------------------------------------------------------------------------------------------------------------------------------------------------------------------------------------------------------------------------------|
|                                                               | <p>_____ [numeric fields, limit 1 to 20]</p> <p>-77 Don't know</p> <p>-88 Refuse to answer</p>                                                                                                                                                                                                                                                                                                    |
| Side.CED.brand                                                | <p><i>Programmer note: ask if selected "yes" to any item in side.CED.ever</i></p> <p><b>When you experienced side effects after consuming energy drinks, what brand/variety did you drink?</b> Select all that apply.</p> <p>[Programmer: show precoded list of brands selected in Brand.tried]</p> <p>Other → Please specify: [open-ended]</p> <p>-77 Don't know</p> <p>-88 Refuse to answer</p> |
| <b>Side-effects</b><br>Side.CED.med                           | <p><i>Programmer note: ask if selected "yes" to any item in side.CED.ever</i></p> <p><b>Did you seek medical help or talk to a health professional about any of these side effects?</b></p> <p>1 Yes</p> <p>2 No</p> <p>-77 Don't know</p> <p>-88 Refuse to answer</p>                                                                                                                            |
| Side.CED.med.effects                                          | <p><i>Programmer note: only ask if Side.CED.med = 1</i></p> <p><b>For what side-effect(s) did you seek medical help?</b></p> <p>[Programmer: show precoded list of effects selected in side.CED.ever]</p> <p>Other → Please specify: [open-ended]</p> <p>-77 Don't know</p> <p>-88 Refuse to answer</p>                                                                                           |
| Side.CED.med.consider                                         | <p><i>Programmer note: only ask if Side.CED.med = 2</i></p> <p><b>Did you consider seeking medical help?</b></p> <p>1 Yes</p> <p>2 No</p> <p>-77 Don't know</p> <p>-88 Refuse to answer</p>                                                                                                                                                                                                       |
| Coffee.intro                                                  | <p><b>The next few questions ask about your use of COFFEE. For these questions, we are interested only in regular, caffeinated coffee, NOT decaf.</b></p>                                                                                                                                                                                                                                         |
| <b>Coffee Ever use</b><br>Coffee.ever.use                     | <p><i>Programmer note: Skip and set to 1 if selected "Coffee" in screener (CI.A.list=1)</i></p> <p><b>Have you <u>ever</u> tried a coffee, even a few sips?</b></p> <p>1 Yes</p> <p>2 No</p> <p>-77 Don't know</p> <p>-88 Refuse to answer</p>                                                                                                                                                    |
| <b>Coffee Consumption-Frequency of use</b><br>Coffee.last.use | <p><i>Programmer note: only ask if Coffee.ever.use = 1</i></p> <p><b>When was the <u>LAST TIME</u> you had a coffee?</b></p> <p>In the last 24 hours</p> <p>In the last 7 days</p> <p>In the last 30 days</p> <p>In the last 6 months</p> <p>In the last 12 months</p> <p>More than 12 months ago</p> <p>-77 Don't know</p> <p>-88 Refuse to answer</p>                                           |



|                                                                                                                                                                                                                                                                                                                    |                                                                                                                                                                                                                                                                                                                                                                                                                                                                                                                                                                                                                                                                                                                                                                                                     |
|--------------------------------------------------------------------------------------------------------------------------------------------------------------------------------------------------------------------------------------------------------------------------------------------------------------------|-----------------------------------------------------------------------------------------------------------------------------------------------------------------------------------------------------------------------------------------------------------------------------------------------------------------------------------------------------------------------------------------------------------------------------------------------------------------------------------------------------------------------------------------------------------------------------------------------------------------------------------------------------------------------------------------------------------------------------------------------------------------------------------------------------|
| <p><b>Side-effects – coffee</b><br/>(side.coffee.ever)</p> <p>Side.coffee.jolt<br/>Side.coffee.jitter<br/>Side.coffee.sleep<br/>Side.coffee.heart<br/>Side.coffee.chest<br/>Side.coffee.nausea<br/>Side.coffee.seizure<br/>Side.coffee.headache<br/>Side.coffee.sex<br/>Side.coffee.other<br/>Side.coffee.none</p> | <p><i>Programmer note: only ask if Coffee.ever.use = 1</i></p> <p><b>Have you ever experienced any of the following after drinking COFFEE?</b><br/>Select all that apply.</p> <ul style="list-style-type: none"> <li>• “Jolt and crash” episodes (feeling of increased alertness and energy followed by a sudden drop in energy)</li> <li>• Headaches</li> <li>• Jittery/shaking</li> <li>• Difficulty sleeping</li> <li>• Fast heart beat</li> <li>• Chest pain</li> <li>• Nausea/vomiting/diarrhea</li> <li>• Seizures</li> <li>• Decreased sexual performance</li> <li>• Dental pain</li> <li>• Other → Please specify: [open-ended]</li> <li>• None of the above [<i>Programmer: allow to select only if no options chosen above</i>]</li> </ul> <p>-77 Don’t know<br/>-88 Refuse to answer</p> |
| <p>Side.coffee.heart.freq</p>                                                                                                                                                                                                                                                                                      | <p><i>Programmer note: only ask if Side.coffee.heart = 1</i></p> <p><b>How many times have you experienced a fast heart beat after consuming COFFEE?</b></p> <p>1 Never<br/>2 Once<br/>3 More than once<br/>-77 Don’t know<br/>-88 Refuse to answer</p>                                                                                                                                                                                                                                                                                                                                                                                                                                                                                                                                             |
| <p>Side.coffee.chest.freq</p>                                                                                                                                                                                                                                                                                      | <p><i>Programmer note: only ask if Side.coffee.chest = 1</i></p> <p><b>How many times have you experienced chest pain after consuming COFFEE?</b></p> <p>1 Never<br/>2 Once<br/>3 More than once<br/>-77 Don’t know<br/>-88 Refuse to answer</p>                                                                                                                                                                                                                                                                                                                                                                                                                                                                                                                                                    |
| <p>Side.coffee.seizure.freq</p>                                                                                                                                                                                                                                                                                    | <p><i>Programmer note: only ask if Side.coffee.seizure = 1</i></p> <p><b>How many times have you experienced seizures after consuming COFFEE?</b></p> <p>1 Never<br/>2 Once<br/>3 More than once<br/>-77 Don’t know<br/>-88 Refuse to answer</p>                                                                                                                                                                                                                                                                                                                                                                                                                                                                                                                                                    |
| <p>Side.coffee.activity</p>                                                                                                                                                                                                                                                                                        | <p><i>Programmer note: ask if selected “yes” to any item in side.coffee.ever</i></p> <p><b>When you experienced side effects after consuming COFFEE, were you also ... (Select all that apply)</b></p> <p>1 Participating in sports or physical activity<br/>2 Drinking alcohol<br/>3 Taking recreational drugs (e.g., marijuana)</p>                                                                                                                                                                                                                                                                                                                                                                                                                                                               |

|                          |                                                                                                                                                                                                                                                                                                                |
|--------------------------|----------------------------------------------------------------------------------------------------------------------------------------------------------------------------------------------------------------------------------------------------------------------------------------------------------------|
|                          | <p>4 Taking medication(s)<br/> 5 Consuming other caffeinated products (energy drinks, supplements, etc.)<br/> 6 None of these [<i>Programmer: only allow if neither option chosen above</i>]<br/> -77 Don't know<br/> -88 Refuse to answer</p>                                                                 |
| Side.coffee.n            | <p><i>Programmer note: ask if selected "yes" to any item in side.coffee.ever</i><br/> <b>When you experienced side effects, how many cups of coffee did you consume?</b><br/> Enter number: _____ [<i>open-ended</i>]<br/> -77 Don't know<br/> -88 Refuse to answer</p>                                        |
| Side.coffee.med          | <p><i>Programmer note: ask if selected "yes" to any item in side.coffee.ever</i><br/> <b>Did you seek medical help or talk to a health professional about any of these side effects?</b><br/> 1 Yes<br/> 2 No<br/> -77 Don't know<br/> -88 Refuse to answer</p>                                                |
| Side.coffee.med.effects  | <p><i>Programmer note: only ask if Side.coffee.med = 1</i><br/> <b>For what side-effect(s) did you seek medical help?</b><br/> [<i>Programmer: show precoded list of effects selected in side.CED.ever</i>]<br/> Other → Please specify: [<i>open-ended</i>]<br/> -77 Don't know<br/> -88 Refuse to answer</p> |
| Side.coffee.med.consider | <p><i>Programmer note: only ask if Side.coffee.med = 2</i><br/> <b>Did you consider seeking medical help?</b><br/> 1 Yes<br/> 2 No<br/> -77 Don't know<br/> -88 Refuse to answer</p>                                                                                                                           |
|                          | <b>Now, back to ENERGY DRINKS.</b>                                                                                                                                                                                                                                                                             |

## Reasons

|                        |                                                                                                                                                                                                                                                                                                                                                                                 |
|------------------------|---------------------------------------------------------------------------------------------------------------------------------------------------------------------------------------------------------------------------------------------------------------------------------------------------------------------------------------------------------------------------------|
| <b>General reasons</b> | <i>Programmer note: randomize list order Pre-coded checklist or yes/no for each option</i>                                                                                                                                                                                                                                                                                      |
| general.reason1        | <p><i>Programmer note: only ask if CED.ever.use = 1 (Ever users)</i><br/> <b>Have you used energy drinks for any of the following reasons?</b><br/> Select all that apply.</p>                                                                                                                                                                                                  |
| general.reason2        | <p><i>Programmer note: only ask if CED.ever.use = 0 or -77 (Never users) AND Susceptibility=1</i><br/> <b>Would you use energy drinks in the future for any of the following reasons?</b><br/> Select all that apply.</p>                                                                                                                                                       |
| general.reason3        | <p><i>Programmer note: only ask if CED.ever.use = 0 or -77 (Never users) AND Susceptibility=0</i><br/> <b>Do people your age use energy drinks for any of the following reasons?</b><br/> Select all that apply.</p> <ol style="list-style-type: none"> <li>1. To stay awake or help concentrate for studying or work</li> <li>2. To stay awake or alert for driving</li> </ol> |

|  |                                                                                                                                                                                                                                                                                                                                                                                                                                                                                                                                                                                                                                                                                                                   |
|--|-------------------------------------------------------------------------------------------------------------------------------------------------------------------------------------------------------------------------------------------------------------------------------------------------------------------------------------------------------------------------------------------------------------------------------------------------------------------------------------------------------------------------------------------------------------------------------------------------------------------------------------------------------------------------------------------------------------------|
|  | <p>3. To feel awake in general (not for a specific activity)</p> <p>4. For the taste</p> <p>5. To improve sports performance or physical activity</p> <p>6. For going out or partying</p> <p>7. To mix with alcohol</p> <p>8. To help lose weight or help keep weight off</p> <p>9. To sober up after drinking alcohol</p> <p>10. To cope with a hangover</p> <p>11. Energy drinks are cool</p> <p>12. My friends drink them [general.reason3: "Their friends drink them"]</p> <p>13. Curious/ Try something new</p> <p>14. Other → Please specify: [open-ended]</p> <p>15. None of the above [Programmer: allow to select only if no options chosen above]</p> <p>-77 Don't know</p> <p>-88 Refuse to answer</p> |
|--|-------------------------------------------------------------------------------------------------------------------------------------------------------------------------------------------------------------------------------------------------------------------------------------------------------------------------------------------------------------------------------------------------------------------------------------------------------------------------------------------------------------------------------------------------------------------------------------------------------------------------------------------------------------------------------------------------------------------|

**Perceptions / risk**

|                                     |                                                                                                                                                                                                                                                                                                                                             |
|-------------------------------------|---------------------------------------------------------------------------------------------------------------------------------------------------------------------------------------------------------------------------------------------------------------------------------------------------------------------------------------------|
| CED.maximum                         | <p><i>Programmer note: Display CED_max_Monster image (located in the 'CED_maximum' folder)</i></p> <p><b>What is the <u>maximum</u> number of cans of this product someone <u>your age</u> should have in <u>one day</u>?</b></p> <p>Enter number: _____ cans [numeric, limit 0 to ?]</p> <p>-77 Don't know</p> <p>-88 Refuse to answer</p> |
| Caffeine.effects                    | <p><b>What are the main ingredient(s) in energy drinks that give the energy boost?</b></p> <p>Please type in the box below, or select "Don't know".</p> <p>_____ [open-ended]</p> <p>-77 Don't know</p> <p>-88 Refuse to answer</p>                                                                                                         |
| Knowledge.ingredients               | <p><b>Are the main ingredients in a "sports drink" (such as <i>Gatorade</i> or <i>Powerade</i>) the same ingredients that give the energy boost in energy drinks such as <i>Red Bull</i> or <i>Monster</i>?</b></p> <p>1 Yes</p> <p>2 No</p> <p>-77 Don't know</p> <p>-88 Refuse to answer</p>                                              |
| Perceived harm<br>Sports.drink.harm | <p><b>Do you think SPORTS DRINKS (such as <i>Gatorade</i> and <i>Powerade</i>) are...</b></p> <p>1 Very good for your health</p> <p>2 Good for your health</p> <p>3 Neither good nor bad</p> <p>4 Bad for your health</p> <p>5 Very bad for your health</p> <p>-77 Don't know</p> <p>-88 Refuse to answer</p>                               |

|                                                                                                                                                                                                     |                                                                                                                                                                                                                                                                                                                                                                                                                                                                                                                                                                                                                                                                                                                                                                                                                                                          |
|-----------------------------------------------------------------------------------------------------------------------------------------------------------------------------------------------------|----------------------------------------------------------------------------------------------------------------------------------------------------------------------------------------------------------------------------------------------------------------------------------------------------------------------------------------------------------------------------------------------------------------------------------------------------------------------------------------------------------------------------------------------------------------------------------------------------------------------------------------------------------------------------------------------------------------------------------------------------------------------------------------------------------------------------------------------------------|
| <p><b>Perceived harm</b></p> <p>CED.harm</p>                                                                                                                                                        | <p><b>Do you think ENERGY DRINKS are . . .</b></p> <p>1 Very good for your health<br/> 2 Good for your health<br/> 3 Neither good nor bad<br/> 4 Bad for your health<br/> 5 Very bad for your health<br/> -77 Don't know<br/> -88 Refuse to answer</p>                                                                                                                                                                                                                                                                                                                                                                                                                                                                                                                                                                                                   |
| <p><b>Sports</b></p> <p>Sports.drink.sports</p>                                                                                                                                                     | <p><i>[insert image of Gatorade – CK_Gatorade.jpg]</i></p> <p><b>Are products like this supposed to improve performance in sports?</b></p> <p>1 Yes<br/> 2 No<br/> -77 Don't know<br/> -88 Refuse to answer</p>                                                                                                                                                                                                                                                                                                                                                                                                                                                                                                                                                                                                                                          |
| <p><b>Sports/activity</b></p> <p>CED.sports</p>                                                                                                                                                     | <p><i>[insert picture of Monster – CK_Monster.jpg]</i></p> <p><b>Are products like this supposed to improve performance in sports?</b></p> <p>1 Yes<br/> 2 No<br/> -77 Don't know<br/> -88 Refuse to answer</p>                                                                                                                                                                                                                                                                                                                                                                                                                                                                                                                                                                                                                                          |
| <p><b>Caffeine content knowledge</b></p> <p>Caffeine.knowledge</p>                                                                                                                                  | <p><i>Programmer note: Display products on screen in random position</i></p> <p><b>Which of the following products has the MOST CAFFEINE?</b></p> <p>Select one.</p> <p><i>[Show CK_Coffee, CK_Coke, CK_Gatorade, CK_Monster images located within the 'Caffeine_Knowledge' folder]</i></p> <p>-77 Don't know<br/> -88 Refuse to answer</p>                                                                                                                                                                                                                                                                                                                                                                                                                                                                                                              |
| <p><b>Caffeine effects</b></p> <p>Effects.opinion</p> <p>Effects.addictive<br/> Effects.anxious<br/> Effects.feel<br/> Effects.weight<br/> Effects.study<br/> Effects.sports<br/> Effects.sleep</p> | <p><b>The next few questions ask about caffeine. There are no right or wrong answers—we are interested in your opinion.</b></p> <p><b>Please indicate whether you agree or disagree with each statement.</b></p> <p><i>[Use these response options for all]</i></p> <p>1 Strongly disagree<br/> 2 Disagree<br/> 3 In the middle<br/> 4 Agree<br/> 5 Strongly agree<br/> -77 Don't know<br/> -88 Refuse to answer</p> <p><i>Programmer note: randomize list of questions</i></p> <p><b>Caffeine is addictive.</b></p> <p><b>Caffeine makes me feel anxious.</b></p> <p><b>I like the way caffeine makes me feel.</b></p> <p><b>Caffeine can help me lose weight or help keep weight off.</b></p> <p><b>Caffeine can help me study.</b></p> <p><b>Caffeine helps me to play sports.</b></p> <p><b>Caffeine makes it hard for me to sleep at night.</b></p> |

|                                                                                                                                        |                                                                                                                                                                                                                                                                                                                                                                                                                                                                                                                                                                                                                                                                                                                                                                                                                                                                                                                                  |
|----------------------------------------------------------------------------------------------------------------------------------------|----------------------------------------------------------------------------------------------------------------------------------------------------------------------------------------------------------------------------------------------------------------------------------------------------------------------------------------------------------------------------------------------------------------------------------------------------------------------------------------------------------------------------------------------------------------------------------------------------------------------------------------------------------------------------------------------------------------------------------------------------------------------------------------------------------------------------------------------------------------------------------------------------------------------------------|
| <p><b>Required statements</b></p> <p>Safe.self<br/>Safe.children<br/>Safe.pregnant<br/>Safe.alcohol<br/>Safe.sports<br/>Safe.study</p> | <p><i>Programmer note: ask first item first always,, insert 1 -5 scale</i><br/> <b>Is it safe for you to use energy drinks?</b></p> <p><i>Programmer note: ask this list in randomized order, insert 1 -5 scale</i><br/> <b>Is it safe for children to use energy drinks?</b><br/> <b>Is it safe for pregnant/breastfeeding women to use energy drinks?</b><br/> <b>It is safe to mix alcohol with energy drinks?</b><br/> <b>Is it safe to use energy drinks while working out or playing sports?</b><br/> <b>Is it safe to use energy drinks to help you study?</b><br/> <b>Is it safe for people your age to drink more than the daily maximum number of cans/bottles printed on the container?</b></p> <p><i>[Use these response options for all]</i><br/> 1 Definitely not safe<br/> 2 Probably not safe<br/> 3 In the middle<br/> 4 Probably safe<br/> 5 Definitely safe<br/> -77 Don't know<br/> -88 Refuse to answer</p> |
| <p><b>Caffeine limit</b></p> <p>Caffeine.limit</p>                                                                                     | <p><b>Do you know the maximum daily intake for caffeine that is recommended by Health Canada for someone your age?</b></p> <p>1 Yes<br/> 2 No<br/> -77 Don't know<br/> -88 Refuse to answer</p>                                                                                                                                                                                                                                                                                                                                                                                                                                                                                                                                                                                                                                                                                                                                  |
| <p>Caffeine.limit.n</p>                                                                                                                | <p><i>Programmer note: ask if caffeine.limit=1</i><br/> <b>What is the maximum daily limit for caffeine recommended by Health Canada, for someone your age?</b> Please type the number of milligrams (mg) below.<br/> _____ mg<br/> -77 Don't know<br/> -88 Refuse to answer</p>                                                                                                                                                                                                                                                                                                                                                                                                                                                                                                                                                                                                                                                 |

## Knowledge, Attitudes, beliefs

|                                                |                                                                                                                                                                                                                                                                                                                                                                                                                                                                                                                                                                                                                                                                                     |
|------------------------------------------------|-------------------------------------------------------------------------------------------------------------------------------------------------------------------------------------------------------------------------------------------------------------------------------------------------------------------------------------------------------------------------------------------------------------------------------------------------------------------------------------------------------------------------------------------------------------------------------------------------------------------------------------------------------------------------------------|
| <p><b>Social norms</b></p> <p>Social.norms</p> | <p><i>Programmer note: randomize order of questions, insert 1 -7 scale, with anchors</i><br/> <b>On a scale from 1 to 7, where 1 is "Totally UNACCEPTABLE" and 7 is "Totally ACCEPTABLE",</b></p> <p><b>Would your <u>parents</u> think it was acceptable for you to consume energy drinks?</b><br/> <i>[1-7 scale with anchors for "Totally UNacceptable" and "Totally Acceptable"]</i><br/> -77 Don't know<br/> -88 Refuse to answer</p> <p><b>Would your <u>friends</u> think it was acceptable for you to consume energy drinks?</b><br/> <i>[1-7 scale with anchors for "Totally UNacceptable" and "Totally Acceptable"]</i><br/> -77 Don't know<br/> -88 Refuse to answer</p> |
|------------------------------------------------|-------------------------------------------------------------------------------------------------------------------------------------------------------------------------------------------------------------------------------------------------------------------------------------------------------------------------------------------------------------------------------------------------------------------------------------------------------------------------------------------------------------------------------------------------------------------------------------------------------------------------------------------------------------------------------------|

|                 |                                                                                                                                                                                                                                                                                                                                                                                                                                                         |
|-----------------|---------------------------------------------------------------------------------------------------------------------------------------------------------------------------------------------------------------------------------------------------------------------------------------------------------------------------------------------------------------------------------------------------------------------------------------------------------|
| Campaign.aware  | <p><b>Have you seen or heard any educational messages that warn about the potential health risks of energy drinks?</b> For example, in print, at school, on TV or radio, online, or other places.</p> <p>1 Yes<br/>2 No<br/>-77 Don't know<br/>-88 Refuse to answer</p>                                                                                                                                                                                 |
| Campaign.detail | <p><i>Programmer note: ask only if campaign.aware=1</i></p> <p><b>Where have you seen educational messages that warn about the potential health risks of energy drinks?</b> Select all that apply.</p> <p>1 Newspaper or magazine<br/>2 Poster or billboard<br/>3 At School<br/>4 On TV<br/>5 On the radio<br/>6 Online / Internet<br/>7 In a store<br/>8 Somewhere else → Please specify: [open-ended]<br/>-77 Don't know<br/>-88 Refuse to answer</p> |
| Campaign.when   | <p><i>Programmer note: If campaign.aware=1</i></p> <p><b>When was the last time you saw an educational message that warned about the potential health risks of energy drinks?</b></p> <p>In the last 24 hours<br/>In the last 7 days<br/>In the last 30 days<br/>In the last 6 months<br/>In the last 12 months<br/>More than 12 months ago<br/>-77 Don't know<br/>-88 Refuse to answer</p>                                                             |

## Marketing awareness

|                     |                                                                                                                                                                                                                                                           |
|---------------------|-----------------------------------------------------------------------------------------------------------------------------------------------------------------------------------------------------------------------------------------------------------|
| Marketing.awareness | <p><b>The next questions ask about advertisements for energy drinks.</b></p> <p><i>Programmer note: randomize order for the following list of questions: ced.tv, ced.social.media, ced.print, ced.online, ced.stores, ced.promotions, ced.samples</i></p> |
| Own.ced.product     | <p><b>Do you own any clothing, posters, stickers, or other products that includes a brand of energy drink?</b></p> <p>1 Yes<br/>2 No<br/>-77 Don't know<br/>-88 Refuse to answer</p>                                                                      |
| CED.ads             | <p><b>Have you ever seen the following types of ads or marketing for energy drinks:</b><br/>Select all that apply.</p> <p>1 Ads on TV</p>                                                                                                                 |

|                                                                                                                                                |                                                                                                                                                                                                                                                                                                                                                                                                                                                                                                                                                                                                                                                           |
|------------------------------------------------------------------------------------------------------------------------------------------------|-----------------------------------------------------------------------------------------------------------------------------------------------------------------------------------------------------------------------------------------------------------------------------------------------------------------------------------------------------------------------------------------------------------------------------------------------------------------------------------------------------------------------------------------------------------------------------------------------------------------------------------------------------------|
| <p>ced.tv<br/>ced.social<br/>ced.online<br/>ced.print<br/>ced.stores<br/>ced.promos<br/>CED.samples<br/>ced.swag<br/>ced.car<br/>ced.other</p> | <p>2 As part of social media sites, like Facebook or Twitter<br/>3 Ads online / on the internet<br/>4 Ads in magazines or newspapers<br/>5 Posters or signs in a convenience or grocery store<br/>6 Promotion or sponsorship, such as logos or links with events, sports teams or athletes<br/>7 Free samples of energy drinks or shots<br/>8 Give-aways of branded merchandise (i.e., energy drink swag)<br/>9 Cars/vehicles with energy drink branding<br/>10 Other → Please specify: [<i>open-ended</i>]<br/>11 None of the above [<i>Programmer: allow to select only if no options chosen above</i>]<br/>-77 Don't know<br/>-88 Refuse to answer</p> |
| <p>ced.tv.last</p>                                                                                                                             | <p><i>Programmer note: If CED.TV=1</i><br/><b>When was the <u>last time</u> you saw an energy drink ad <u>on TV</u>?</b><br/>In the last 24 hours<br/>In the last 7 days<br/>In the last 30 days<br/>In the last 6 months<br/>In the last 12 months<br/>More than 12 months ago<br/>-77 Don't know<br/>-88 Refuse to answer</p>                                                                                                                                                                                                                                                                                                                           |
| <p>ced.social.last</p>                                                                                                                         | <p><i>Programmer note: If CED.social=1</i><br/><b>When was the <u>last time</u> you saw an energy drink ad <u>as part of a social media site, like Facebook or Twitter</u>?</b><br/>In the last 24 hours<br/>In the last 7 days<br/>In the last 30 days<br/>In the last 6 months<br/>In the last 12 months<br/>More than 12 months ago<br/>-77 Don't know<br/>-88 Refuse to answer</p>                                                                                                                                                                                                                                                                    |
| <p>ced.online.last</p>                                                                                                                         | <p><i>Programmer note: If CED.online=1</i><br/><b>When was the <u>last time</u> you saw an energy drink ad <u>online / on the internet</u>?</b><br/>In the last 24 hours<br/>In the last 7 days<br/>In the last 30 days<br/>In the last 6 months<br/>In the last 12 months<br/>More than 12 months ago<br/>-77 Don't know<br/>-88 Refuse to answer</p>                                                                                                                                                                                                                                                                                                    |
| <p>ced.print.last</p>                                                                                                                          | <p><i>Programmer note: If CED.print=1</i><br/><b>When was the <u>last time</u> you saw an energy drink ad in <u>magazines or newspapers</u>?</b><br/>In the last 24 hours<br/>In the last 7 days</p>                                                                                                                                                                                                                                                                                                                                                                                                                                                      |

|                  |                                                                                                                                                                                                                                                                                                                                                                                                                                                                    |
|------------------|--------------------------------------------------------------------------------------------------------------------------------------------------------------------------------------------------------------------------------------------------------------------------------------------------------------------------------------------------------------------------------------------------------------------------------------------------------------------|
|                  | <p>In the last 30 days<br/>         In the last 6 months<br/>         In the last 12 months<br/>         More than 12 months ago<br/>         -77 Don't know<br/>         -88 Refuse to answer</p>                                                                                                                                                                                                                                                                 |
| ced.stores.last  | <p><i>Programmer note: If ced.stores =1</i><br/> <b>When was the <u>last time</u> you saw a <u>poster or sign</u> for energy drinks in a convenience or grocery store?</b><br/>         In the last 24 hours<br/>         In the last 7 days<br/>         In the last 30 days<br/>         In the last 6 months<br/>         In the last 12 months<br/>         More than 12 months ago<br/>         -77 Don't know<br/>         -88 Refuse to answer</p>          |
| ced.promos.last  | <p><i>Programmer note: If CED.promotions=1</i><br/> <b>When was the <u>last time</u> you saw an energy drink company <u>promoting or sponsoring an event, team, or athlete?</u></b><br/>         In the last 24 hours<br/>         In the last 7 days<br/>         In the last 30 days<br/>         In the last 6 months<br/>         In the last 12 months<br/>         More than 12 months ago<br/>         -77 Don't know<br/>         -88 Refuse to answer</p> |
| ced.samples.last | <p><i>Programmer note: If CED.samples=1</i><br/> <b>When was the <u>last time</u> you saw an energy drink company offering <u>free samples of energy drinks or shots?</u></b><br/>         In the last 24 hours<br/>         In the last 7 days<br/>         In the last 30 days<br/>         In the last 6 months<br/>         In the last 12 months<br/>         More than 12 months ago<br/>         -77 Don't know<br/>         -88 Refuse to answer</p>       |
| ced.swag.last    | <p><i>Programmer note: If CED.samples=1</i><br/> <b>When was the <u>last time</u> you saw an energy drink company offering <u>merchandise give-aways?</u></b><br/>         In the last 24 hours<br/>         In the last 7 days<br/>         In the last 30 days<br/>         In the last 6 months<br/>         In the last 12 months<br/>         More than 12 months ago</p>                                                                                     |



|              |                                                                                                                                                                                                                                                                                                                                                                                           |
|--------------|-------------------------------------------------------------------------------------------------------------------------------------------------------------------------------------------------------------------------------------------------------------------------------------------------------------------------------------------------------------------------------------------|
|              | <p>-77 Don't know</p> <p>-88 Refuse to answer</p>                                                                                                                                                                                                                                                                                                                                         |
| ced.car.last | <p><i>Programmer note: If CED.samples=1</i></p> <p><b>When was the <u>last time</u> you saw a car or other vehicle branded by an energy drink company?</b></p> <p>In the last 24 hours</p> <p>In the last 7 days</p> <p>In the last 30 days</p> <p>In the last 6 months</p> <p>In the last 12 months</p> <p>More than 12 months ago</p> <p>-77 Don't know</p> <p>-88 Refuse to answer</p> |

## Marketing perceptions

|                       |                                                                                                                                                                                                                                                                                                                                                                                                                |
|-----------------------|----------------------------------------------------------------------------------------------------------------------------------------------------------------------------------------------------------------------------------------------------------------------------------------------------------------------------------------------------------------------------------------------------------------|
| Ad.target.age.1       | <p><i>Programmer Note: Randomly assign participants to see one of three images on the screen. Show one of: ad_rb1.jpg, ad_rb2.jpg, ad_rb3.jpg (located within the 'Ad' folder).</i></p> <p><b>What age group does this ad target?</b></p> <p>Select all that apply.</p> <p>1 People younger than me</p> <p>2 People my age</p> <p>3 People older than me</p> <p>-77 Don't know</p> <p>-88 Refuse to answer</p> |
| Ad.target.sport.<br>1 | <p><i>Programmer Note: Please show participant the same image they were assigned to in the previous question (Ad.target.age.1)</i></p> <p><b>Does this ad promote using these energy drinks during sports?</b></p> <p>1 Yes</p> <p>2 No</p>                                                                                                                                                                    |

|                     |                                                                                                                                                                                                                                                                                                                                                                                                                                           |
|---------------------|-------------------------------------------------------------------------------------------------------------------------------------------------------------------------------------------------------------------------------------------------------------------------------------------------------------------------------------------------------------------------------------------------------------------------------------------|
|                     | <p>-77 Don't know<br/>-88 Refuse to answer</p>                                                                                                                                                                                                                                                                                                                                                                                            |
| Ad.target.alcohol.1 | <p><i>Programmer Note: Please show participant the same image they were assigned to in the previous question (Ad.target.age.1)</i></p> <p><b>Does this ad promote using these energy drinks with alcohol?</b></p> <p>1 Yes<br/>2 No<br/>-77 Don't know<br/>-88 Refuse to answer</p>                                                                                                                                                       |
| Ad.target.age.2     | <p><i>Programmer Note: Randomly assign participants to see one of 2 images on the screen. Show one of [ad_sport_1.jpg, ad_sport_2.jpg]</i></p>  <p><b>What age group does this ad target?</b><br/>Select all that apply.</p> <p>1 People younger than me<br/>2 People my age<br/>3 People older than me<br/>-77 Don't know<br/>-88 Refuse to answer</p> |
| Ad.target.sport.2   | <p><i>Programmer Note: Please show participant the same image they were assigned to in the previous question (Ad.target.age.2)</i></p> <p><b>Does this ad promote using these energy drinks during sports?</b></p> <p>1 Yes<br/>2 No<br/>-77 Don't know<br/>-88 Refuse to answer</p>                                                                                                                                                      |
| Ad.target.alcohol.2 | <p><i>Programmer Note: Please show participant the same image they were assigned to in the previous question (Ad.target.age.2)</i></p> <p><b>Does this ad promote using these energy drinks with alcohol?</b></p> <p>1 Yes<br/>2 No<br/>-77 Don't know<br/>-88 Refuse to answer</p>                                                                                                                                                       |
| Ad.target.age.3     | <p><i>Programmer Note: Randomly assign participants to see one of 2 images on the screen. Show one of [ad_party_1.jpg, ad_party_2.jpg]:</i></p>                                                                                                                                                                                                                                                                                           |

|                            |                                                                                                                                                                                                                                                                                                                                                                    |
|----------------------------|--------------------------------------------------------------------------------------------------------------------------------------------------------------------------------------------------------------------------------------------------------------------------------------------------------------------------------------------------------------------|
|                            |  <p><b>What age group does this ad target?</b><br/>         Select all that apply.</p> <ul style="list-style-type: none"> <li>1 People younger than me</li> <li>2 People my age</li> <li>3 People older than me</li> <li>-77 Don't know</li> <li>-88 Refuse to answer</li> </ul> |
| <p>Ad.target.sport.3</p>   | <p><i>Programmer Note: Please show participant the same image they were assigned to in the previous question (Ad.target.age.3)</i></p> <p><b>Does this ad promote using these energy drinks during sports?</b></p> <ul style="list-style-type: none"> <li>1 Yes</li> <li>2 No</li> <li>-77 Don't know</li> <li>-88 Refuse to answer</li> </ul>                     |
| <p>Ad.target.alcohol.3</p> | <p><i>Programmer Note: Please show participant the same image they were assigned to in the previous question (Ad.target.age.3)</i></p> <p><b>Does this ad promote using these energy drinks with alcohol?</b></p> <ul style="list-style-type: none"> <li>1 Yes</li> <li>2 No</li> <li>-77 Don't know</li> <li>-88 Refuse to answer</li> </ul>                      |
|                            |                                                                                                                                                                                                                                                                                                                                                                    |

**AmED - Patterns of Use**

|                                    |                                                                                                                                                                                                                                            |
|------------------------------------|--------------------------------------------------------------------------------------------------------------------------------------------------------------------------------------------------------------------------------------------|
| <p>Aware.patterns</p>              | <p><b>The next questions ask about drinking alcohol and energy drinks together. Alcohol includes beer, wine, coolers, and liquor such as vodka, rum, gin and whiskey.</b></p>                                                              |
| <p>Awareness AmED Aware.AmED</p>   | <p><i>Programmer note: Ask all</i></p> <p><b>Have you ever heard of mixing alcohol with energy drinks?</b></p> <ul style="list-style-type: none"> <li>1 Yes</li> <li>2 No</li> <li>-77 Don't know</li> <li>-88 Refuse to answer</li> </ul> |
| <p>Awareness Jäger Aware.Jager</p> | <p><i>Programmer note: Ask all</i></p> <p><b>Have you ever heard of a Jägerbomb?</b></p> <ul style="list-style-type: none"> <li>1 Yes</li> </ul>                                                                                           |

|                                                         |                                                                                                                                                                                                                                                                                                                                                                                                                      |
|---------------------------------------------------------|----------------------------------------------------------------------------------------------------------------------------------------------------------------------------------------------------------------------------------------------------------------------------------------------------------------------------------------------------------------------------------------------------------------------|
|                                                         | <p>2 No<br/>-77 Don't know<br/>-88 Refuse to answer</p>                                                                                                                                                                                                                                                                                                                                                              |
| <p><b>Awareness VdkED</b><br/>Aware.VdkED</p>           | <p><i>Programmer note: Ask all</i><br/><b>Have you ever heard of vodka Red Bull?</b><br/>1 Yes<br/>2 No<br/>-77 Don't know<br/>-88 Refuse to answer</p>                                                                                                                                                                                                                                                              |
| <p><b>Ever Use Alcohol</b><br/>Ever.use.alc</p>         | <p><i>Programmer note: Ask all</i><br/><b>Have you ever had a drink of alcohol that was more than just a sip?</b><br/>1 Yes<br/>2 No<br/>-77 Don't know<br/>-88 Refuse to answer</p>                                                                                                                                                                                                                                 |
| <p><b>Frequency Use Alcohol</b><br/>Freq.alc.use</p>    | <p><i>Programmer note: Ever.use.alc=1</i><br/><b><u>In the last 12 months</u>, how often did you have a drink of alcohol that was more than just a sip?</b><br/>0 Not at all<br/>1 Less than once a month<br/>2 Once a month<br/>3 2-3 times a month<br/>4 Once a week<br/>5 More than once a week<br/>-77 Don't know<br/>-88 Refuse to answer</p>                                                                   |
| <p><b>Frequency Use Alcohol 2</b><br/>Freq.alc.use2</p> | <p><i>Programmer note: Ever.use.alc=2-9</i><br/><b><u>In the last 12 months</u>, how often did you have <u>5 drinks of alcohol or more on one occasion</u>?</b><br/>0 I did not have 5 or more drinks on one occasion in the last 12 months<br/>1 Less than once a month<br/>2 Once a month<br/>3 2 to 3 times a month<br/>4 Once a week<br/>5 More than once a week<br/>-77 Don't know<br/>-88 Refuse to answer</p> |
| <p><b>Ever Use AmED</b><br/>Ever.use.amed</p>           | <p><i>Programmer note: Ask all</i><br/><b>Have you <u>ever</u> had alcohol and an energy drink (such as <i>Red Bull, Rockstar, Monster, or another brand</i>) on the same occasion (for example during a party)?</b><br/>1 Yes<br/>2 No<br/>-77 Don't know<br/>-88 Refuse to answer</p>                                                                                                                              |
| <p><b>Frequency Use AmED</b><br/>Freq.use.amed</p>      | <p><i>Programmer note: Ask if ever.use.amed=1</i><br/><b><u>In the last 12 months</u>, how often have you had alcohol and an energy drink on the same occasion (for example during a party)?</b><br/>0 Not at all</p>                                                                                                                                                                                                |

|                                                                         |                                                                                                                                                                                                                                                                                                                                                                                                                                                                                                                                                                                                                                                                                                                                                                                                                                                                                                                                                                                                                                                                                                                          |
|-------------------------------------------------------------------------|--------------------------------------------------------------------------------------------------------------------------------------------------------------------------------------------------------------------------------------------------------------------------------------------------------------------------------------------------------------------------------------------------------------------------------------------------------------------------------------------------------------------------------------------------------------------------------------------------------------------------------------------------------------------------------------------------------------------------------------------------------------------------------------------------------------------------------------------------------------------------------------------------------------------------------------------------------------------------------------------------------------------------------------------------------------------------------------------------------------------------|
|                                                                         | <p>1 Less than once a month<br/> 2 Once a month<br/> 3 2-3 times a month<br/> 4 Once a week<br/> 5 More than once a week<br/> -77 Don't know<br/> -88 Refuse to answer</p>                                                                                                                                                                                                                                                                                                                                                                                                                                                                                                                                                                                                                                                                                                                                                                                                                                                                                                                                               |
| (ever.type)<br><br>Ever.type1<br>Ever.type2<br>Ever.type3<br>Ever.type4 | <p><i>Programmer note: Ask all</i><br/> <b>The next few questions ask about <u>different ways</u> of having alcohol and energy drinks.</b></p> <p><b>Have you ever had any of the following:</b><br/> Select all that apply.<br/> [Pre-coded checklist or yes/no for each option]</p> <p><b>1 an alcoholic energy drink <u>pre-mixed in a bottle or can</u></b> (for example, <i>Rockstar+Vodka, Rev, Molson Kick, 3A.M.Vodka</i>, or others)<br/> <b>2 alcohol and an energy drink <u>that a bartender served you</u></b> (for example, vodka with <i>Red Bull</i>, a <i>Jägerbomb</i>, or others)<br/> <b>3 alcohol and an energy drink <u>that you mixed together yourself</u></b> (for example, vodka with <i>Red Bull</i>, a <i>Jägerbomb</i> or others)<br/> <b>4 alcohol and an energy drink <u>on the same occasion, but NOT mixed together</u></b>, such as having an energy drink before going to an event, and then having a beer or other alcoholic beverage later<br/> 5. None of the above [Programmer: allow to select only if no options chosen above]<br/> -77 Don't know<br/> -88 Refuse to answer</p> |
| <b>Frequency Use Type 1</b><br>Freq.type1                               | <p><i>Programmer note: Only ask if Ever.type1=1</i><br/> <b>In the last 12 months, how often have you had an alcoholic energy drink <u>pre-mixed in a bottle or can</u>, such as <i>Rockstar+Vodka, Rev, Molson Kick, or 3A.M.Vodka</i>?</b></p> <p>0 Not at all<br/> 1 Less than once a month<br/> 2 Once a month<br/> 3 2-3 times a month<br/> 4 Once a week<br/> 5 More than once a week<br/> -77 Don't know<br/> -88 Refuse to answer</p>                                                                                                                                                                                                                                                                                                                                                                                                                                                                                                                                                                                                                                                                            |
| <b>Frequency Use Type 2</b><br>Freq.type2                               | <p><i>Programmer note: Only ask if Ever.type2=1</i><br/> <b>In the last 12 months, how often have you had alcohol and an energy drink <u>that a bartender served you?</u></b> (For example, vodka with <i>Red Bull</i>, a <i>Jägerbomb</i> or others).</p> <p>0 Not at all<br/> 1 Less than once a month<br/> 2 Once a month<br/> 3 2-3 times a month<br/> 4 Once a week<br/> 5 More than once a week<br/> -77 Don't know<br/> -88 Refuse to answer</p>                                                                                                                                                                                                                                                                                                                                                                                                                                                                                                                                                                                                                                                                  |
| <b>Frequency Use Type 3</b><br>Freq.type3                               | <p><i>Programmer note: Only ask if Ever.type3=1</i><br/> <b>In the last 12 months, how often have you had alcohol and an energy drink <u>that you mixed together yourself?</u></b> (For example, vodka with <i>Red Bull</i>, a <i>Jägerbomb</i> or others).</p>                                                                                                                                                                                                                                                                                                                                                                                                                                                                                                                                                                                                                                                                                                                                                                                                                                                          |

|                                                   |                                                                                                                                                                                                                                                                                                                                                                                                                                                                                                                                    |
|---------------------------------------------------|------------------------------------------------------------------------------------------------------------------------------------------------------------------------------------------------------------------------------------------------------------------------------------------------------------------------------------------------------------------------------------------------------------------------------------------------------------------------------------------------------------------------------------|
|                                                   | <p>0 Not at all</p> <p>1 Less than once a month</p> <p>2 Once a month</p> <p>3 2-3 times a month</p> <p>4 Once a week</p> <p>5 More than once a week</p> <p>-77 Don't know</p> <p>-88 Refuse to answer</p>                                                                                                                                                                                                                                                                                                                         |
| <p><b>Frequency Use Type 4</b><br/>Freq.type4</p> | <p><i>Programmer note: Only ask if Ever.type4=1</i></p> <p><b><u>In the last 12 months, how often have you had alcohol and an energy drink on the same occasion, but not mixed together,</u></b> such as having an energy drink before going to an event, and then having a beer or other alcoholic beverage later?</p> <p>0 Not at all</p> <p>1 Less than once a month</p> <p>2 Once a month</p> <p>3 2-3 times a month</p> <p>4 Once a week</p> <p>5 More than once a week</p> <p>-77 Don't know</p> <p>-88 Refuse to answer</p> |
| <p><b>Offered Amed</b><br/>Offer.amed</p>         | <p><i>Programmer note: Only ask if Ever.amed.use=0</i></p> <p><b>Have you ever been offered alcohol mixed with an energy drink to try?</b></p> <p>1 Yes</p> <p>2 No</p> <p>-77 Don't know</p> <p>-88 Refuse to answer</p>                                                                                                                                                                                                                                                                                                          |
| <p><b>Susceptibility 1</b><br/>Amed.try</p>       | <p><i>Programmer note: Only ask if Ever.amed.use=0</i></p> <p><b>Are you interested in trying alcohol mixed with an energy drink <u>in the future?</u></b></p> <p>0 Definitely yes</p> <p>1 Probably yes</p> <p>2 Not sure</p> <p>3 Probably not</p> <p>4 Definitely not</p> <p>-77 Don't know</p> <p>-88 Refuse to answer</p>                                                                                                                                                                                                     |
| <p><b>Susceptibility 3</b><br/>Try.offer.amed</p> | <p><i>Programmer note: Only ask if Ever.amed.use=0</i></p> <p><b>If one of your best friends were to offer you alcohol mixed with an energy drink, would you drink it?</b></p> <p>0 Definitely yes</p> <p>1 Probably yes</p> <p>2 Not sure</p> <p>3 Probably not</p> <p>4 Definitely not</p> <p>-77 Don't know</p> <p>-88 Refuse to answer</p>                                                                                                                                                                                     |
| <p><b>Friend Use</b></p>                          | <p><i>Programmer note: Ask all</i></p>                                                                                                                                                                                                                                                                                                                                                                                                                                                                                             |

|                                                                                                                                                                                                                                                                               |                                                                                                                                                                                                                                                                                                                                                                                                                                                                                                                                                                                                                                                                                                                                                                                                              |
|-------------------------------------------------------------------------------------------------------------------------------------------------------------------------------------------------------------------------------------------------------------------------------|--------------------------------------------------------------------------------------------------------------------------------------------------------------------------------------------------------------------------------------------------------------------------------------------------------------------------------------------------------------------------------------------------------------------------------------------------------------------------------------------------------------------------------------------------------------------------------------------------------------------------------------------------------------------------------------------------------------------------------------------------------------------------------------------------------------|
| <p>Friend.AmED.use</p>                                                                                                                                                                                                                                                        | <p><b>Of your five closest friends, how many have tried alcohol mixed with an energy drink?</b></p> <p>None<br/>         1 friend<br/>         2 friends<br/>         3 friends<br/>         4 friends<br/>         5 friends<br/>         -77 Don't know<br/>         -88 Refuse to answer</p>                                                                                                                                                                                                                                                                                                                                                                                                                                                                                                              |
| <p><b>Reasons for Use</b><br/>Reason.AmED.use</p>                                                                                                                                                                                                                             | <p><i>Programmer note: Only ask if Ever.amed.use=1</i></p> <p><b>Have you EVER had alcohol mixed with an energy drink for any of the following reasons?</b><br/>         Select all that apply.</p> <ol style="list-style-type: none"> <li>1. To get drunk</li> <li>2. To be able to drink more</li> <li>3. To avoid a hangover</li> <li>4. To stay alert for driving</li> <li>5. To stay awake</li> <li>6. To boost energy</li> <li>7. For the taste</li> <li>8. Someone offered it to me</li> <li>9. Because my friends were drinking them</li> <li>10. Curious/Try something new</li> <li>11. Other → Please specify: [open-ended]</li> <li>12. None of the above [<i>Programmer: allow to select only if no options chosen above</i>]</li> </ol> <p>-77 Don't know<br/>         -88 Refuse to answer</p> |
| <p>(ever.amED.loc1<br/>         )<br/>         Ever. AmED.loc1<br/>         Ever. AmED.loc2<br/>         Ever. AmED.loc3<br/>         Ever. AmED.loc4<br/>         Ever. AmED.loc5<br/>         Ever. AmED.loc6<br/>         Ever. AmED.loc7<br/>         Ever. AmED.loc8</p> | <p><i>Programmer note: Only ask if Ever.amed.use=1</i></p> <p><b>Have you ever had alcohol mixed with an energy drink in any of the following places:</b><br/>         Select all that apply.<br/>         [[Pre-coded checklist or yes/no for each option]</p> <ol style="list-style-type: none"> <li>1 At work</li> <li>2 At school</li> <li>3 While driving</li> <li>4 At home</li> <li>5 At someone else's house</li> <li>6 At a restaurant</li> <li>7 At a bar/pub/nightclub</li> <li>8 Somewhere else → Please specify: [open-ended]</li> </ol> <p>-77 Don't know<br/>         -88 Refuse to answer</p>                                                                                                                                                                                                |

**Risk Behaviour**

|                                           |                                                                                                                                                                                                                                                                                                   |
|-------------------------------------------|---------------------------------------------------------------------------------------------------------------------------------------------------------------------------------------------------------------------------------------------------------------------------------------------------|
| <p><b>CED.Alertness</b><br/>CED.alert</p> | <p><i>Programmer note: Ask if (Ever.alc.use=1 AND CED.ever.use=1)</i></p> <p><b>During or after drinking alcohol, have you ever had an energy drink to be more alert so you could keep partying or stay out longer?</b></p> <ol style="list-style-type: none"> <li>1 Yes</li> <li>2 No</li> </ol> |
|-------------------------------------------|---------------------------------------------------------------------------------------------------------------------------------------------------------------------------------------------------------------------------------------------------------------------------------------------------|

|                                       |                                                                                                                                                                                                                                                  |
|---------------------------------------|--------------------------------------------------------------------------------------------------------------------------------------------------------------------------------------------------------------------------------------------------|
|                                       | -77 Don't know<br>-88 Refuse to answer                                                                                                                                                                                                           |
| <b>AmED.Drive</b><br>AmED.drive       | <i>Programmer note: Ask if (Ever.alc.use=1 AND CED.ever.use=1) AND age &gt;15)</i><br><br><b>After drinking alcohol, have you ever had an energy drink to be more alert to drive?</b><br>1 Yes<br>2 No<br>-77 Don't know<br>-88 Refuse to answer |
| <b>Drunk.Driving</b><br>Alcohol.drive | <i>Programmer note: Ask if age &gt;15</i><br><br><b>In the last 12 months, have you been in a car when the driver had been drinking alcohol?</b><br>1 Yes<br>2 No<br>-77 Don't know<br>-88 Refuse to answer                                      |

|              |                                                                                                                                                                                                                                                     |
|--------------|-----------------------------------------------------------------------------------------------------------------------------------------------------------------------------------------------------------------------------------------------------|
| <b>month</b> | <b>In what month are you completing this survey?</b><br>1 January<br>2 February<br>3 March<br>4 April<br>5 May<br>6 June<br>7 July<br>8 August<br>9 September<br>10 October<br>11 November<br>12 December<br>-77 Don't know<br>-88 Refuse to answer |
|--------------|-----------------------------------------------------------------------------------------------------------------------------------------------------------------------------------------------------------------------------------------------------|

**Product views**

|  |                                                                                                                                                                                                                                                                                                                                                                                                                                          |
|--|------------------------------------------------------------------------------------------------------------------------------------------------------------------------------------------------------------------------------------------------------------------------------------------------------------------------------------------------------------------------------------------------------------------------------------------|
|  | <i>Programmer note: Make sure these images show up on screen in the size provided (same # of pixels).<br/>Participants will be assigned to view one of 12 energy drink product conditions on the screen.<br/>Each participant should see both the 'EC#_Front' and 'EC#_Back' images from one of the 12 condition sub-folders located within the Experimental_Conditions folder.</i><br><b>FRONT (same for EN and FR): [EC_front.jpg]</b> |
|--|------------------------------------------------------------------------------------------------------------------------------------------------------------------------------------------------------------------------------------------------------------------------------------------------------------------------------------------------------------------------------------------------------------------------------------------|



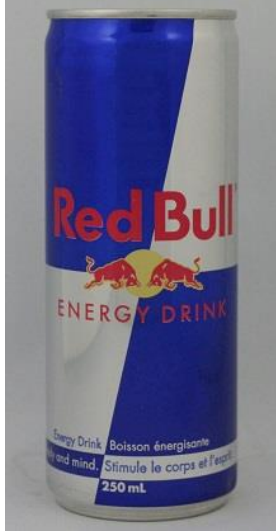

**BACK (EN and FR versions): [EC\_back.jpg]**

| Condition | Text colour | Fill       | Border       |  |
|-----------|-------------|------------|--------------|--|
| 1         | Black       | No fill    | No border    |  |
| 2         | Black       | No fill    | Black border |  |
| 3         | Black       | No fill    | Red border   |  |
| 4         | Black       | White fill | No border    |  |

|    |       |            |              |                                                                                       |
|----|-------|------------|--------------|---------------------------------------------------------------------------------------|
| 5  | Black | White fill | Black border |    |
| 6  | Black | White fill | Red border   |    |
| 7  | Blue  | No fill    | No border    |    |
| 8  | Blue  | No fill    | Black border |   |
| 9  | Blue  | No fill    | Red border   |  |
| 10 | Blue  | White fill | No border    |  |

|                |                                                                                                                                                                                                                                                                                                                                                                                                                                                                        |      |            |              |                                                                                     |  |
|----------------|------------------------------------------------------------------------------------------------------------------------------------------------------------------------------------------------------------------------------------------------------------------------------------------------------------------------------------------------------------------------------------------------------------------------------------------------------------------------|------|------------|--------------|-------------------------------------------------------------------------------------|--|
|                | 11                                                                                                                                                                                                                                                                                                                                                                                                                                                                     | Blue | White fill | Black border |  |  |
|                | 12                                                                                                                                                                                                                                                                                                                                                                                                                                                                     | Blue | White fill | Red border   |  |  |
| EC.interest    | <p><b>Would you be interested in trying this product?</b><br/>                 [1-10 scale with anchors range from “Not at all interested” to “Extremely interested”]<br/>                 -77 Don’t know<br/>                 -88 Refuse to answer</p>                                                                                                                                                                                                                |      |            |              |                                                                                     |  |
| EC.safe        | <p><b>Is this product safe for people your age to drink?</b><br/>                 [1-10 scale with anchors range from “Not at all safe” to “Extremely safe”]<br/>                 -77 Don’t know<br/>                 -88 Refuse to answer</p>                                                                                                                                                                                                                         |      |            |              |                                                                                     |  |
| EC.recommend   | <p><i>Programmer note: Ask if age&lt;=18</i><br/> <b>Is this product appropriate for people your age to drink?</b><br/>                 1 Yes<br/>                 2 No<br/>                 -77 Don’t know<br/>                 -88 Refuse to answer</p>                                                                                                                                                                                                              |      |            |              |                                                                                     |  |
| EC.warning     | <p>[Programmer: After pictures disappear from screen, participants not allowed to go back to that screen:]<br/> <b>Please describe any health warnings or statements that appeared on the energy drink on the previous screen. If you remember more than one warning or statement, please describe as many as possible.</b><br/>                 [Open ended, 800 character maximum]<br/>                 -77 Don’t know<br/>                 -88 Refuse to answer</p> |      |            |              |                                                                                     |  |
| Product.energy | <p><i>Programmer note: Randomize respondents to view one of the following 2 images – make sure the images show up on screen in the size provided (same # of pixels). [Product_1.jpg, Product_2.jpg]</i><br/>                 1. Novel energy drink brand with “energy drink” in description on usual front label<br/>                 2. Novel energy drink brand with “caffeinated energy drink” in description on usual front label</p>                              |      |            |              |                                                                                     |  |

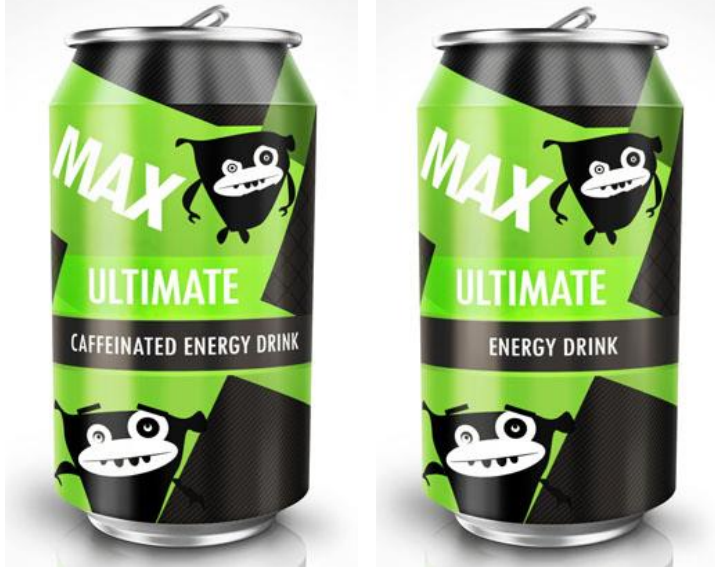

**What do you think the word “energy” on this product refers to?**

- An ingredient → Please specify: [open-ended]
- Something else → Please specify: [open-ended]
- 77 Don't know
- 88 Refuse to answer

Product.caffeine

*Programmer: show same image as in previous question, show “don't know” as other responses appear, “refuse” can be greyed*

**Does this product contain caffeine?**

- 1 Yes
- 2 No
- 3 Don't know
- 88 Refuse to answer

**Socio-demographics**

|            |                                                                                                                                                                                                                                                                                                                                                                                      |
|------------|--------------------------------------------------------------------------------------------------------------------------------------------------------------------------------------------------------------------------------------------------------------------------------------------------------------------------------------------------------------------------------------|
| Background | <b>The next few questions ask about you, and help us to get a picture of your background.</b>                                                                                                                                                                                                                                                                                        |
| Height     | <p><b>It is helpful to know the height and weight of survey participants.</b></p> <p><b>How tall are you without shoes?</b></p> <p>Enter number: _____ <b>feet</b> [numeric, 3-7]</p> <p>AND</p> <p>Enter number: _____ <b>inches</b> [numeric, 0-12]</p> <p><b>OR</b></p> <p>Enter number: _____ <b>cm</b> [numeric, 100-250]</p> <p>77. Don't know</p> <p>88. Refuse to answer</p> |
| Weight     | <p><b>How much do you weigh without clothes or shoes?</b></p> <p>Enter number: _____ <b>pounds</b> [numeric, 60-999]</p>                                                                                                                                                                                                                                                             |

|                  |                                                                                                                                                                                                                                                                                                                |
|------------------|----------------------------------------------------------------------------------------------------------------------------------------------------------------------------------------------------------------------------------------------------------------------------------------------------------------|
|                  | <p><b>OR</b></p> <p>Enter number: _____ kg [numeric, 30-500]</p> <p>77. Don't know<br/>88. Refuse to answer</p>                                                                                                                                                                                                |
| Weight.behaviour | <p><b>Which of the following are you trying to do about your weight:</b></p> <ol style="list-style-type: none"> <li>1. Lose weight</li> <li>2. Gain weight</li> <li>3. Stay the same weight</li> <li>4. Not trying to do anything about your weight?</li> </ol> <p>77. Don't know<br/>88. Refuse to answer</p> |
| Health.status    | <p><b>Do you have any of the following health conditions?</b><br/>Select all that apply.</p> <p>Heart condition<br/>Diabetes<br/>Other health condition → Please specify: [open-ended]<br/>None</p> <p>-77 Don't know<br/>-88 Refuse to answer</p>                                                             |
| Sleep            | <p><b>Now a few questions about your sleep.</b></p>                                                                                                                                                                                                                                                            |
| Sleep.time       | <p><b>How many hours do you usually spend sleeping in a 24 hour period, excluding time spent resting?</b></p> <p>_____ hours [numeric]</p> <p>-77 Don't know<br/>-88 Refuse to answer</p>                                                                                                                      |
| Sleep.trouble    | <p><b>How often do you have trouble going to sleep or staying asleep?</b></p> <ol style="list-style-type: none"> <li>1. Never</li> <li>2. Rarely</li> <li>3. Sometimes</li> <li>4. Most of the time</li> <li>5. All of the time</li> </ol> <p>-77. Don't know<br/>-88. Prefer not to say</p>                   |
| Awake.difficult  | <p><b>How often do you find it difficult to stay awake during your normal waking hours?</b></p> <ol style="list-style-type: none"> <li>1. Never</li> <li>2. Rarely</li> <li>3. Sometimes</li> <li>4. Most of the time</li> <li>5. All of the time</li> </ol> <p>-77. Don't know<br/>-88. Prefer not to say</p> |
| Sports           | <p><b>Do you watch or follow any extreme sports?</b></p>                                                                                                                                                                                                                                                       |

|                  |                                                                                                                                                                                                                                                                                                                                                                                                                                                                                                                                                                                                                                |
|------------------|--------------------------------------------------------------------------------------------------------------------------------------------------------------------------------------------------------------------------------------------------------------------------------------------------------------------------------------------------------------------------------------------------------------------------------------------------------------------------------------------------------------------------------------------------------------------------------------------------------------------------------|
|                  | <p>0 No<br/>                 1 Yes<br/>                 -77 Don't know<br/>                 -88 Refuse to answer</p>                                                                                                                                                                                                                                                                                                                                                                                                                                                                                                           |
| School           | <p><b>Are you in . . .</b><br/>                 Grade 6<br/>                 Grade 7<br/>                 Grade 8<br/>                 Grade 9<br/>                 Grade 10<br/>                 Grade 11<br/>                 Grade 12<br/>                 College<br/>                 University<br/>                 Other → Please specify: [<i>open-ended</i>]<br/>                 Not in school<br/>                 -77 Don't know<br/>                 -88 Refuse to answer</p>                                                                                                                                    |
| School2          | <p><i>Programmer note: Ask if school="Not in school" OR "Other"</i><br/> <b>What is the highest level of formal education you have completed?</b><br/>                 Less than high school<br/>                 High school diploma or equivalent<br/>                 Some technical / trade school or community college<br/>                 Completed technical / trade school or community college<br/>                 Some university, no degree<br/>                 Completed university degree<br/>                 Post-graduate degree<br/>                 -77. Don't know<br/>                 -88. Refused</p> |
| School.grades    | <p><b>On average, what marks [do/did] you usually get [when you were] in school?</b><br/>                 Select ONE.<br/> <i>[Programmer: Use "did" and "when you were" if school="Not in school"]</i><br/>                 Below 50% (Mostly Fs)<br/>                 50-59% (Mostly Ds)<br/>                 60-69% (Mostly Cs)<br/>                 70-79% (Mostly Bs)<br/>                 80-89% (Mostly As or A+s)<br/>                 90-100% (Mostly A+)<br/>                 -77. Don't know<br/>                 -88. Refuse to answer</p>                                                                         |
| Education.father | <p><b>The next two questions are about your parents. By parents ("mother", or "father"), we mean whoever you consider your parents/guardians to be. They could be your birth parents, adoptive parents, stepparents, foster parents, or legal guardians.</b></p> <p><b>What is the highest level of education <u>your father</u> completed?</b><br/>                 Did not attend high school<br/>                 Attended high school<br/>                 Graduated high school</p>                                                                                                                                       |

|                  |                                                                                                                                                                                                                                                                                                                                                                                                                                                                                               |
|------------------|-----------------------------------------------------------------------------------------------------------------------------------------------------------------------------------------------------------------------------------------------------------------------------------------------------------------------------------------------------------------------------------------------------------------------------------------------------------------------------------------------|
|                  | <p>Attended college<br/>         Graduated college<br/>         Attended university<br/>         Graduated university<br/>         -77. Don't know<br/>         -88. Refuse to answer</p>                                                                                                                                                                                                                                                                                                     |
| Education.mother | <p><b>What is the highest level of education <u>your mother</u> completed?</b></p> <p>Did not attend high school<br/>         Attended high school<br/>         Graduated high school<br/>         Attended college<br/>         Graduated college<br/>         Attended university<br/>         Graduated university<br/>         -77. Don't know<br/>         -88. Refuse to answer</p>                                                                                                     |
| Spending money   | <p><b>About how much money do you usually get each week to spend on yourself or to save?</b><br/>         Include all money from allowance and jobs.</p> <p>Zero<br/>         \$1 to \$10<br/>         \$11 to \$20<br/>         \$21 to \$40<br/>         \$41 to \$100<br/>         \$101 to \$200<br/>         \$201 to \$300<br/>         \$301 to \$500<br/>         More than \$500<br/>         -77 I do not know how much money I get each week<br/>         -88 Refuse to answer</p> |
| Province         | <p><b>What province do you live in?</b></p> <p>Alberta<br/>         British Columbia<br/>         Manitoba<br/>         New Brunswick<br/>         Newfoundland and Labrador<br/>         Nova Scotia<br/>         Ontario<br/>         Prince Edward Island<br/>         Quebec<br/>         Saskatchewan<br/>         -88. Refuse to answer</p>                                                                                                                                             |
| Ethnicity        | <p><b>People living in Canada come from many different cultural and racial backgrounds. Are you...</b><br/>         Select all that apply</p> <ol style="list-style-type: none"> <li>1. White?</li> <li>2. Chinese?</li> <li>3. South Asian (e.g., East Indian, Pakistani, Sri Lankan)?</li> </ol>                                                                                                                                                                                            |

|                                                            |                                                                                                                                                                                                                                                                                                                                                                                                                     |
|------------------------------------------------------------|---------------------------------------------------------------------------------------------------------------------------------------------------------------------------------------------------------------------------------------------------------------------------------------------------------------------------------------------------------------------------------------------------------------------|
|                                                            | <ol style="list-style-type: none"> <li>4. Black?</li> <li>5. Filipino?</li> <li>6. Latin American?</li> <li>7. Southeast Asian (e.g., Cambodian, Indonesian, Laotian, Vietnamese)?</li> <li>8. Arab?</li> <li>9. West Asian (e.g., Afghan, Iranian)?</li> <li>10. Japanese?</li> <li>11. Korean?</li> <li>12. Other → Please specify: <i>[open-ended]</i></li> </ol> <p>-77 Don't know<br/>-88 Refuse to answer</p> |
| Aboriginal.status                                          | <p><b>Are you an Aboriginal person, that is, First Nations (North American Indian), Métis or Inuk (Inuit)?</b></p> <ol style="list-style-type: none"> <li>1. Yes</li> <li>2. No</li> </ol> <p>-77 Don't know<br/>-88 Refuse to answer</p>                                                                                                                                                                           |
| <p><b>Sensation seeking</b></p> <p>Sensation. seeking1</p> | <p><b>Please tell me how much you agree or disagree with each of the following statements.</b></p> <p><b>I like to do frightening things. Do you...</b></p> <ol style="list-style-type: none"> <li>1 Strongly disagree</li> <li>2 Disagree</li> <li>3 Neither disagree nor agree</li> <li>4 Agree</li> <li>5 Strongly agree</li> </ol> <p>-77. Don't know<br/>-88. Refuse to answer</p>                             |
| Sensation. seeking2                                        | <p><b>I like new and exciting experiences, even if I have to break the rules. Do you...</b></p> <ol style="list-style-type: none"> <li>1 Strongly disagree</li> <li>2 Disagree</li> <li>3 Neither disagree nor agree</li> <li>4 Agree</li> <li>5 Strongly agree</li> </ol> <p>-77. Don't know<br/>-88. Refuse to answer</p>                                                                                         |
| Sensation. seeking3                                        | <p><b>I prefer friends who are exciting and unpredictable. Do you...</b></p> <ol style="list-style-type: none"> <li>1 Strongly disagree</li> <li>2 Disagree</li> <li>3 Neither disagree nor agree</li> <li>4 Agree</li> <li>5 Strongly agree</li> </ol> <p>-77. Don't know<br/>-88. Refuse to answer</p>                                                                                                            |
| Cohort.q                                                   | <p><b>We conducted a similar survey on energy drinks last year. Did you complete the last survey?</b></p> <ol style="list-style-type: none"> <li>1 Yes</li> </ol>                                                                                                                                                                                                                                                   |



|  |                                                               |
|--|---------------------------------------------------------------|
|  | <p>2 No</p> <p>-77 Don't know</p> <p>-88 Refuse to answer</p> |
|--|---------------------------------------------------------------|

## Feedback

That's all the questions we have for you today.

Is there anything else you'd like to tell us, or any answers that you would change in the survey?

[open-ended]

No, I have nothing to add

Thank you for participating in our study – we appreciate your help.

Please take a moment to go over the following information.

- As mentioned earlier, we are interested in people's use of and opinions about energy drinks.
- Participants were shown different types of energy drinks so that we can see whether the packaging design affects people's opinions of the products.
- Participants were asked about their use of energy drinks with alcohol to examine trends in use of mixing these products together among youth.
- As a reminder, this study has been reviewed by and received ethics clearance through a University of Waterloo Research Ethics Committee. If you have any comments or concerns resulting from your involvement please contact either Dr. Maureen Nummelin, the Director, Office of Research Ethics, at 1-519-888-4567, ext. 36005 or [maureen.nummelin@uwaterloo.ca](mailto:maureen.nummelin@uwaterloo.ca), or Professor David Hammond at 519-888-4567 ext. 36462 or [dhammond@uwaterloo.ca](mailto:dhammond@uwaterloo.ca).
- If you would like any further information about the study, including a copy of our findings when they become available, please contact Professor David Hammond at 519-888-4567 ext. 36462 or [dhammond@uwaterloo.ca](mailto:dhammond@uwaterloo.ca).
- We really appreciate your participation, and hope that this has been an interesting experience for you.
